# Supplementary material for: Lifestyle and Empowerment Techniques in Survivorship of Gynaecologic Oncology (LETSGO study): a study protocol for a multicentre longitudinal interventional study using mobile health technology and biobanking
Source: PubMed Central journal article supplement — BMJ Open. 2021 Jul 12;11(7):e050930. doi: 10.1136/bmjopen-2021-050930 (PMC8276283; doi:10.1136/bmjopen-2021-050930), 2021-07-12
Supplement: bmjopen-2021-050930.draft_revisions.pdf [file bmjopen-2021-050930.draft_revisions.pdf]

# BMJ Open

BMJ Open is committed to open peer review. As part of this commitment we make the peer review history of every article we publish publicly available.

When an article is published we post the peer reviewers' comments and the authors' responses online. We also post the versions of the paper that were used during peer review. These are the versions that the peer review comments apply to.

The versions of the paper that follow are the versions that were submitted during the peer review process. They are not the versions of record or the final published versions. They should not be cited or distributed as the published version of this manuscript.

BMJ Open is an open access journal and the full, final, typeset and author-corrected version of record of the manuscript is available on our site with no access controls, subscription charges or pay-per-view fees (<http://bmjopen.bmj.com>).

If you have any questions on BMJ Open's open peer review process please email [info.bmjopen@bmj.com](mailto:info.bmjopen@bmj.com)

# BMJ Open

**Lifestyle and Empowerment Techniques in Survivorship of  
Gynecologic Oncology (LETSGO study).  
A multicenter longitudinal cohort study using mobile health  
technology and biobanking.**

|                               |                                                                                                                                                                                                                                                                                                                                                                                                                                                                                                                                                                                                                                                                                                                                                                                                                                                                                                                                             |
|-------------------------------|---------------------------------------------------------------------------------------------------------------------------------------------------------------------------------------------------------------------------------------------------------------------------------------------------------------------------------------------------------------------------------------------------------------------------------------------------------------------------------------------------------------------------------------------------------------------------------------------------------------------------------------------------------------------------------------------------------------------------------------------------------------------------------------------------------------------------------------------------------------------------------------------------------------------------------------------|
| Journal:                      | <i>BMJ Open</i>                                                                                                                                                                                                                                                                                                                                                                                                                                                                                                                                                                                                                                                                                                                                                                                                                                                                                                                             |
| Manuscript ID                 | bmjopen-2021-050930                                                                                                                                                                                                                                                                                                                                                                                                                                                                                                                                                                                                                                                                                                                                                                                                                                                                                                                         |
| Article Type:                 | Protocol                                                                                                                                                                                                                                                                                                                                                                                                                                                                                                                                                                                                                                                                                                                                                                                                                                                                                                                                    |
| Date Submitted by the Author: | 08-Mar-2021                                                                                                                                                                                                                                                                                                                                                                                                                                                                                                                                                                                                                                                                                                                                                                                                                                                                                                                                 |
| Complete List of Authors:     | Vistad, Ingvild ; Sorlandet Hospital Kristiansand, Obstetric and gynecology ; University of Bergen, Clinical department 2<br>Skorstad, Mette; Sorlandet Hospital Kristiansand, Obstetric and gynecology<br>Demmelmaier, Ingrid; Uppsala Universitet, Department of Public Health and Caring Sciences, Lifestyle and rehabilitation in long-term illness<br>Småstuen, Milada; Oslo Metropolitan University, Department of Nursing and Health Promotion<br>Lindemann, Kristina; Oslo University Hospital, Dept. of Gynaecologic oncology; University of Oslo, Institute of Clinical Medicine<br>Wisløff, Torbjørn; UiT The Arctic University of Norway, Department of Community Medicine<br>van de Poll-Franse, Lonneke; Netherlands Cancer Institute, Psychosocial research and epidemiology; IKNL, Research, Netherlands Comprehensive Cancer Organization<br>Berntsen, Sveinung; University of Agder, Faculty of Health and Sport Sciences |
| Keywords:                     | Gynaecological oncology < GYNAECOLOGY, Quality in health care < HEALTH SERVICES ADMINISTRATION & MANAGEMENT, Information technology < BIOTECHNOLOGY & BIOINFORMATICS, Change management < HEALTH SERVICES ADMINISTRATION & MANAGEMENT, Health economics < HEALTH SERVICES ADMINISTRATION & MANAGEMENT, Protocols & guidelines < HEALTH SERVICES ADMINISTRATION & MANAGEMENT                                                                                                                                                                                                                                                                                                                                                                                                                                                                                                                                                                 |
|                               |                                                                                                                                                                                                                                                                                                                                                                                                                                                                                                                                                                                                                                                                                                                                                                                                                                                                                                                                             |

SCHOLARONE™  
Manuscripts

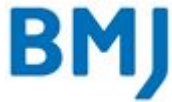

I, the Submitting Author has the right to grant and does grant on behalf of all authors of the Work (as defined in the below author licence), an exclusive licence and/or a non-exclusive licence for contributions from authors who are: i) UK Crown employees; ii) where BMJ has agreed a CC-BY licence shall apply, and/or iii) in accordance with the terms applicable for US Federal Government officers or employees acting as part of their official duties; on a worldwide, perpetual, irrevocable, royalty-free basis to BMJ Publishing Group Ltd ("BMJ") its licensees and where the relevant Journal is co-owned by BMJ to the co-owners of the Journal, to publish the Work in this journal and any other BMJ products and to exploit all rights, as set out in our [licence](#).

The Submitting Author accepts and understands that any supply made under these terms is made by BMJ to the Submitting Author unless you are acting as an employee on behalf of your employer or a postgraduate student of an affiliated institution which is paying any applicable article publishing charge ("APC") for Open Access articles. Where the Submitting Author wishes to make the Work available on an Open Access basis (and intends to pay the relevant APC), the terms of reuse of such Open Access shall be governed by a Creative Commons licence – details of these licences and which [Creative Commons](#) licence will apply to this Work are set out in our licence referred to above.

Other than as permitted in any relevant BMJ Author's Self Archiving Policies, I confirm this Work has not been accepted for publication elsewhere, is not being considered for publication elsewhere and does not duplicate material already published. I confirm all authors consent to publication of this Work and authorise the granting of this licence.

## Lifestyle and Empowerment Techniques in Survivorship of Gynecologic Oncology (LETSGO study).

### A multicenter longitudinal cohort study using mobile health technology and biobanking.

Ingvild Vistad<sup>1,2</sup>, Mette Skorstad<sup>1</sup>, Ingrid Demmelmaier<sup>3,4</sup>, Milada Småstuen<sup>5</sup>, Kristina Lindemann<sup>6,7</sup>, Torbjørn Wisløff<sup>8,9</sup>, Lonneke van de Poll Franse<sup>10,11,12</sup>, Sveinung Berntsen<sup>4</sup>.

<sup>1</sup> Dept. of Gynaecology and Obstetrics, Sorlandet Hospital HF Kristiansand, Norway

<sup>2</sup> Clinical Institute II, Medical department, University of Bergen, Bergen, Norway

<sup>3</sup> Department of Public Health and Caring Sciences, Uppsala University, Uppsala, Sweden

<sup>4</sup> Department of Sport Science and Physical Education, Faculty of Health and Sport Sciences, University of Agder, Kristiansand, Norway

<sup>5</sup> Department of Nursing and Health promotion, Faculty of Health Sciences, Oslo Metropolitan University, Oslo, Norway

<sup>6</sup> Dept. of Gynaecologic oncology, Division of Cancer Medicine, Oslo University Hospital, Oslo, Norway

<sup>7</sup> Faculty of Medicine, Institute of Clinical Medicine, University of Oslo, Oslo, Norway

<sup>8</sup> Department of Community Medicine, Arctic University of Tromsø, Tromsø, Norway

<sup>9</sup> Department of Health Management and Health Economics, University of Oslo, Oslo, Norway

<sup>10</sup> Netherlands Comprehensive Cancer Organisation, Utrecht, The Netherlands

<sup>11</sup> CoRPS - Center of Research on Psychology in Somatic diseases, Department of Medical and Clinical psychology, Tilburg University, Tilburg, The Netherlands

<sup>12</sup> Division of Psychosocial Research & Epidemiology, The Netherlands Cancer Institute, Amsterdam, The Netherlands

<sup>1</sup> Corresponding author:

Ingvild Vistad, MD, PhD, Department of Obstetrics and Gynecology, Sorlandet Hospital HF, Service Box 416, 4604 Kristiansand, Norway; Tel.: +47 38 07 30 70; E-mail: ingvild.vistad@sshf.no

## Introduction

The number of gynecological cancer survivors is increasing and there is a need for a more sustainable model of follow-up care. Today's follow-up model is time-consuming and patients have reported unmet needs regarding information about their cancer and strategies for managing the consequences of treatment. The main aim of this study is to assess health-related empowerment—in terms of patient education, psychosocial support, and promotion of physical activity—in a new follow-up model by comparing it to standard follow-up in a cohort study involving intervention hospitals and reference hospitals.

## Methods and analysis

At the intervention hospitals, patients will be stratified by risk of recurrence and late effects to either 1 or 3 years' follow-up. Nurses will replace doctors in half of the follow-up visits and focus in particular on patient education, self-management, and physical activity. They will provide patients with information and guide them in goal setting and action planning. These measures will be reinforced by a smartphone application for monitoring symptoms and promoting physical activity. At the reference hospitals, patients will be included in the standard follow-up program. All patients will be asked to complete questionnaires at baseline and after 3, 6, 12, 24, and 36 months. Blood samples will be collected for biobanking at 3, 12, and 36 months. The primary outcome is health-related empowerment. Secondary outcomes include health-related quality of life, adherence to physical activity recommendations, time to recurrence, health care costs, and changes in biomarkers. Changes in these outcomes will be analyzed using generalized linear mixed models for repeated measures. Type of hospital (intervention or reference), time (measurement point), and possible confounders will be included as fixed factors.

## Ethics and dissemination

The study is approved by the Regional Committee for Medical Research Ethics (2019/11093). Dissemination of findings will occur at the local, national, and international levels.

The protocol is registered on [www.clinicaltrials.gov](http://www.clinicaltrials.gov) (NCT04122235).

## Strengths and limitations of this study

- This is a large cohort study with a quasi-randomized design that reflects daily clinical practice.
- At intervention hospitals, nurses aim to empower the participants by providing information, helping with goal setting, and monitoring physical activity. These measures are reinforced with a smartphone application.
- The study has a translational approach with the establishment of a longitudinal biobank of samples of blood and blood components.
- A health economic evaluation will explore if the new follow-up program results in fewer scheduled appointments at the intervention hospitals, which may have an effect on resource utilization.
- With a non-randomized design, imbalances in prognostic factors between the groups cannot be entirely removed.

## Introduction

1  
2  
3 The current global yearly incidence of gynecological cancer is almost 1.3 million cases and is expected  
4 to increase by 44.6% by 2040 (1). The increase in prevalence will pose challenges for post-treatment  
5 follow-up models, which are currently time-consuming, expensive, and lack evidence of efficacy  
6 regarding survival and quality of life (QoL) (2). Traditional hospital-based follow-up has been  
7 criticized for being too focused on the detection of recurrences and less attentive to physical and  
8 psychological rehabilitation after cancer treatment (3, 4). Consequently, survivors report unmet  
9 needs relating to their cancer treatment, comorbidities, and economic and family concerns (5). A  
10 small number of clinical and economic evaluations of alternative approaches to survivorship care  
11 after gynecological cancer have been reported (3). These include evaluations of nurse-led telephone  
12 follow-up and comparisons between more intensive and less intensive follow-up procedures (3, 6-8).  
13 One alternative model for delivering care in cancer survivorship is the risk-stratification model,  
14 whereby patients are stratified according to their risk of developing late effects of treatment or  
15 cancer recurrence (9). Only three randomized controlled trials (RCTs) comparing different follow-up  
16 models have been published to date, two in low-risk endometrial cancer patients (6, 7) and one in  
17 ovarian cancer patients (8). These studies are limited by small sample sizes (ranging from 112 to 156  
18 participants) and short follow-up (ranging from 10 to 24 months) (6-8). A Cochrane review of follow-  
19 up after treatment for cervical cancer found no evidence from RCTs to support any specific follow-up  
20 model over others. Thus, well-designed prospective studies on follow-up models are needed (10).  
21  
22  
23  
24  
25  
26

27  
28 Gynecological cancer survivors report a high prevalence of treatment-related symptoms that can  
29 affect their QoL. The most frequently reported symptoms are fatigue, neuropathy, lymphedema,  
30 sexual dysfunction, cognitive dysfunction, anxiety, and depression (11-16). Some of these symptoms  
31 may also be signs of disease recurrence (17). In a study of symptoms related to first recurrence after  
32 treatment for gynecological cancer, two-thirds of the patients experienced symptoms at recurrence,  
33 but only 55% sought care earlier than their scheduled visit (17), which may have delayed detection of  
34 recurrence and appropriate symptom management. This underlines the importance of providing  
35 education on alarm symptoms and motivating patients to actively manage their condition after  
36 gynecological cancer treatment (2, 18). In a cancer survivorship context, health-related  
37 empowerment refers to an individual's feelings of being able to manage the challenges of the cancer  
38 experience and of having a sense of control over their own life (19). The facilitation of empowerment  
39 through education and self-management strategies to enhance problem-solving skills, action  
40 planning and self-efficacy are components of the chronic care model developed by the MacColl  
41 Institute for Healthcare Innovation (2, 18, 20). To the best of our knowledge, only two studies have  
42 assessed follow-up models using a self-management approach after primary treatment for  
43 gynecological cancer (7, 21), one of which was a randomized controlled trial (7). In this trial, which  
44 focused on low-risk endometrial cancer patients, patient-initiated follow-up was compared to  
45 standard care 10 months after treatment (7). The women in the intervention group reported more  
46 fear of recurrence compared to women in the control group, which suggests that women may need  
47 organized support to feel reassured despite having a low risk of recurrence (7). In the other study,  
48 which included low-risk endometrial cancer patients, a majority of participants reported that patient-  
49 initiated follow-up enabled them to have more control over their own health. However, this study  
50 did not include a control group, so conclusions about effects compared to usual care could not be  
51 drawn (21).  
52  
53  
54  
55  
56  
57  
58  
59  
60

1  
2  
3 A follow-up model designed to increase health-related empowerment provides opportunities for  
4 highlighting patients' lifestyle in terms of health behaviors, such as physical activity. It is well known  
5 that physical activity provides multiple psychological and physiological benefits after a cancer  
6 diagnosis and is associated with increased health-related QoL, as well as a reduced risk of cancer  
7 morbidity (22, 23). International health authorities recommend that all adults, including cancer  
8 survivors, should engage in moderate-intensity physical activity for a minimum of 150 min per week  
9 or vigorous-intensity physical activity for at least 75 min per week (24). Although patients often  
10 request information about health-promoting strategies, many gynecological cancer survivors find it  
11 difficult to alter their lifestyles without external motivation (25). Research has consistently shown  
12 that interventions targeting patient autonomy and self-regulation (the ability to act in one's own  
13 long-term best interest) can promote physical activity behavior changes (26). To date, only a small  
14 number of studies have examined the feasibility and effects of lifestyle interventions in gynecological  
15 cancer survivors. These studies have shown that lifestyle interventions have the potential to improve  
16 QoL and reduce fatigue (27).  
17  
18  
19  
20  
21

22 Mobile health (mHealth) is a subset of the broader concept of electronic health and refers to the use  
23 of mobile devices to support the delivery of medical and public health care to individuals and  
24 populations. According to the World Health Organization, mHealth has the potential to transform  
25 health service delivery across the globe (28). In recent years, mobile web applications (apps) have  
26 increasingly been used to promote chronic disease management, including among patients with  
27 cancer (29-31). Regular reporting of a limited set of symptoms has been found to be an accurate and  
28 cost-effective way of detecting recurrences and treatment-related late effects in patients with cancer  
29 in the lungs and breasts (32, 33). Smartphone apps have also been used as tools to enhance physical  
30 function and physical activity in cancer patients (34, 35).  
31  
32  
33  
34

35 Studies indicate that pro-inflammatory cytokines are important in the pathophysiology of cancer  
36 symptoms, including psycho-behavioral symptoms (36) and that chronic inflammation increases the  
37 risk of cancer-related comorbidity and mortality (36-38). Furthermore, inflammation and metabolic  
38 status have been linked to metabolic syndrome, which is closely related to the incidence of  
39 endometrial cancer (39). Despite growing evidence of the role of biomarkers in cancer-related  
40 morbidity and QoL, studies investigating the contribution of biomarkers to gynecological cancer  
41 survivorship are limited.  
42  
43  
44

45 Against this background, our research group has developed a follow-up program based on the  
46 principles of the risk-stratification model and the chronic care model involving a 1-year hospital  
47 follow-up for low-risk gynecological cancer patients or a 3-year follow-up for medium/high-risk  
48 patients. For half of the consultations, nurses will replace the doctors and will use evidence-based  
49 behavior change techniques to coach the cancer patients on how to take a more active role in  
50 managing their health conditions (40-42). The nurses will focus on information on symptoms of  
51 recurrence, management of late effects, goal setting for physical activity, action planning, review of  
52 goal setting, and monitoring of physical activity. The techniques will be reinforced with the  
53 multifunctional Lifestyle and Self-Management Techniques in Survivorship of Gynecologic Oncology  
54 (LETSGO) app, which includes the following functions (Figure 1):  
55  
56  
57

58 1) Monitoring and self-reporting of symptoms (related to suspected recurrence or late effects)  
59  
60

1  
2  
3 2) Targeted information on treatment, signs of recurrence, and late effects of each gynecological  
4 cancer type

5 3) Promoting early rehabilitation by provision of information on physical activity, goal setting, and  
6 electronic reminders

7  
8 The LETSGO follow-up model has been pilot-tested in 12 gynecological cancer patients  
9 (NCT03453788).

10  
11  
12 The aim of the LETSGO study is to evaluate a new program for follow-up after gynecological cancer.  
13 The program is based on risk stratification and patient self-management and includes nurse-led  
14 coaching, mHealth technology, and promotion of physical activity. It will be compared to the  
15 standard follow-up program, which follows Norwegian guidelines.

16 The objectives are to

17  
18 (1) compare patient empowerment (primary outcome) in patients attending intervention hospitals  
19 and those attending reference hospitals at 12 months,

20 (2) compare health-related QoL between the intervention group and the reference group,

21 (3) compare physical activity between the intervention group and the reference group,

22 (4) compare time to detection of recurrence between the intervention group and the reference  
23 group,

24 (5) assess whether the intervention is cost-effective compared to current practice, and

25 (6) identify relationships between self-management, physical activity, and various biomarkers.  
26  
27  
28  
29

### 30 **Methods**

31 The study follows the SPIRIT (Standard Protocol Items: Recommendations for clinical trials) checklist  
32 (43) and World Health Organization Trial Registration Data Set.  
33  
34

35 Table 1 approximately here  
36

### 37 **Design**

38 The LETSGO study is a longitudinal, quasi-experimental multicenter cohort study comparing a new  
39 follow-up program at intervention hospitals with the standard follow-up program at reference  
40 hospitals.  
41  
42

### 43 **Study population**

44 We have begun to recruit a cohort of women who have completed treatment for gynecological  
45 cancer. The study is being conducted at 10 Norwegian hospitals (five intervention and five reference  
46 hospitals). University hospitals, regional hospitals and all Norwegian health regions are equally  
47 distributed in both groups, and their standard follow-up routines do not differ (44). Participating  
48 hospitals are listed at [www.clinicaltrials.gov](http://www.clinicaltrials.gov). Medical specialists and study nurses will inform eligible  
49 patients about the study before the first follow-up visit after primary treatment has been completed.  
50  
51  
52

### 53 *Inclusion criteria*

54 Eligible participants (1) have histologically verified cervical cancer (restricted to squamous cell  
55 carcinoma, adenocarcinoma, or adenosquamous carcinoma), endometrial cancer, ovarian cancer  
56 (restricted to epithelial type), or vulvar cancer; (2) have completed primary standard treatment and  
57 are scheduled for follow-up; (3) are able (both physically and cognitively) to complete patient-  
58  
59  
60



1  
2  
3 reported outcome measures independently in Norwegian; (4) are  $\geq 18$  years; and (5) are able to  
4 provide informed consent.  
5

#### 6 7 *Exclusion criteria*

8 Patients are ineligible if they (1) are participating in a clinical treatment trial; (2) are on intravenous  
9 maintenance treatment (e.g., bevacizumab); (3) are cervical cancer patients who have been treated  
10 with trachelectomy.  
11

#### 12 13 **Study timeline**

14 Enrollment of participants started in November 2019 and is due to close in December 2024 or after  
15 accrual and the last patient visit is completed  
16

#### 17 18 **Intervention hospitals**

##### 19 20 *Nurse-led consultations*

21 The low-risk group will be followed up for 1 year and the medium/high-risk group for 3 years (Table  
22 1). Before entering the follow-up program, the participants will be assigned to either the low-risk  
23 group or the medium/high-risk group according to predefined risk criteria. The low-risk group  
24 includes patients with (1) cervical cancer FIGO (International Federation of Gynecology and  
25 Obstetrics) stage IA1 with negative cytology and human papilloma virus status at 9 months after  
26 treatment; (2) endometrial cancer FIGO stage IA or B with endometrioid adenocarcinoma grade 1  
27 and no adjuvant therapy; or (3) ovarian cancer FIGO stage IA and no adjuvant therapy. The  
28 medium/high-risk group includes patients with (1) cervical cancer FIGO stage IA1 with positive  
29 cytology and human papilloma virus status at 9 months after treatment or any other FIGO stage; (2)  
30 endometrial cancer at any stage except FIGO stage IA/B with endometrioid adenocarcinoma grade 1;  
31 (3) ovarian cancer FIGO stage IA with adjuvant chemotherapy or FIGO stage IB to IVB; or (4) vulvar  
32 cancer at any stage.  
33  
34  
35  
36  
37

38  
39 The first visit will take place 3-5 weeks after treatment ends. A second nurse-led visit will take place  
40 7-8 weeks after treatment. Thereafter, patients will alternate between nurse- and doctor-led  
41 consultations, as depicted in Figure 1. At the 3- to 5-week visit, the nurse will assess the women's  
42 physical and emotional status, as well as aspects of her lifestyle and family environment. Patients  
43 with smartphones or tablets will be introduced to the LETSGO app (see below), and patients without  
44 smartphones or tablets will be provided with an information booklet containing identical information  
45 to that contained in the app. At the second nurse-led visit, the nurse will explore the patient's  
46 previous physical activity and their motivation for future physical activity, using an autonomous  
47 supportive communication style inspired by motivational interviewing (45). In addition, the nurse will  
48 work with the patient to set individualized goals for physical activity in line with the patients'  
49 motivation and barriers. To encourage physical activity, the patients will receive a Garmin activity  
50 tracker and will be instructed to wear it all day through the entire study period. The step count is  
51 displayed in the LETSGO app when the patient's mobile phone is connected to the activity tracker.  
52 Goals will be reviewed and adapted accordingly at subsequent nurse-led visits.  
53  
54  
55  
56  
57

58 The patients at the intervention hospitals will have access to the LETSGO app throughout the 3-year  
59 study period, irrespective of their risk group (except cervical cancer patients in the low-risk group  
60

1  
2  
3 who have been treated with conization only, to avoid unnecessary fear of cancer recurrence in this  
4 low-risk population). At the final follow-up visit (at 12 months or 36 months, depending on the risk  
5 group), the nurse will emphasize the importance of being attentive to symptoms as signs of  
6 recurrence and of a healthy lifestyle for well-being. The patients will receive written information on  
7 whom to contact if they experience treatment-related side effects or suspect disease recurrence. A  
8 summary of the patient's treatment, potential side effects, and symptoms of potential recurrence  
9 will be sent to the patient's responsible general practitioner. The nurses involved in the study are  
10 familiar with gynecological cancer patients. They have participated in a 2-day intensive course  
11 covering relevant subjects, including gynecological cancer treatment, physical and mental treatment-  
12 related symptoms, symptoms of recurrence, benefits of physical activity, autonomous supportive  
13 communication style, and motivation and individualized goal setting for physical activity. The nurses'  
14 education was reinforced by an electronic learning program with modules covering these subjects,  
15 which they were required to complete before the course.

### 21 *The LETSGO app*

22 The app is available for smartphones and tablets. It contains information on the different  
23 gynecological cancers, as well as lifestyle information and advice. It is distributed through Apple  
24 Store and Google Play, and a personal code is required to open the study version.

25 The app consists of the following modules (Figure 1):

- 26 1. Disease-specific information (written and audiovisual) on ovarian, uterine, cervical, or vulvar  
27 cancer, signs of recurrence, and late effects after treatment
- 28 2. General lifestyle information
- 29 3. Physical activity exercises and programs with instructions (written and audiovisual) for both  
30 beginners and experienced persons
- 31 4. Physical activity goal setting: Participants will be asked to define a goal for the week (e.g., a 30-  
32 minute walk twice a week or strength exercise in a health studio three times a week).
- 33 5. Monitoring of symptoms of recurrence: Once monthly, the participants will be asked to rate 10  
34 symptoms that may indicate recurrence.

35 Patient-reported outcome studies have shown that the most frequent symptoms of recurrence are  
36 pain and fatigue for all gynecological cancers and bleeding for endometrial and cervical cancer (17).  
37 To cover these symptoms, we have selected relevant items from the European Organisation of  
38 Research and Treatment of Cancer (EORTC) item library (46), adjusted to each cancer type. The 10  
39 EORTC items in the app refer to the preceding week. For instance, patients treated for endometrial  
40 or cervical cancer will be asked, "Have you had abnormal bleeding from your vagina?". Each  
41 participant will rate the severity of their symptoms in the preceding week from 0 (not at all) to 3  
42 (very much). If a predefined threshold is reached, the participant will receive an alert on their phone  
43 or tablet informing her that the answer given may indicate recurrence and advising her to phone the  
44 pre-saved telephone number of the gynecological outpatient clinic. We anticipate that some  
45 participants may refrain from making contact. Therefore, the database will be checked for flags at  
46 regular time points by the project data manager. Patient visits and imaging will be brought forward if  
47 recurrence is suspected.

### 59 **Control hospitals**

1  
2  
3 Patients will receive standard follow-up according to current guidelines. Standard follow-up in  
4 Norway consists of clinical examination with vaginal ultrasound three to four times a year during the  
5 first 2 years, twice a year for the next 3 years, and annually thereafter, depending on the  
6 recommendations of the patient's doctor.  
7  
8

### 9 **Data collection**

10 Data will be collected using medical records, patient registries, validated questionnaires (electronic  
11 or written), and blood samples. Primary and secondary outcomes will be measured for all  
12 participants at enrollment (for baseline data) and again at 3, 6, 12, 24, and 36 months. Biobank  
13 samples will be collected at 3, 12, and 36 months and at time of recurrence, if applicable). At each  
14 time point, a reminder will be sent within 3 weeks to any participant who does not return the  
15 questionnaire. For the intervention group, data will also be abstracted from the app and the activity  
16 tracker.  
17  
18  
19

### 20 **Primary outcome**

#### 21 *Patient empowerment*

22 The Health Education Impact Questionnaire (heiQ), a well-validated, widely used measurement  
23 system for comprehensively assessing the effects of health education programs on self-management,  
24 was selected to measure aspects of empowerment in a cancer setting (19, 47). It consists of 40  
25 questions grouped into eight domains. Responses are given on four-point Likert scales ranging from  
26 "strongly agree" to "strongly disagree," and the ratings are summed for each domain: positive and  
27 active engagement in life; health-directed activity; skill and technique acquisition; constructive  
28 attitudes and approaches; self-monitoring and insight; health service navigation; social integration  
29 and support; and emotional well-being. Reverse scoring is applied to emotional items, with higher  
30 scores indicating higher levels of empowerment. The heiQ has been translated into several languages  
31 and has been validated in a Norwegian population (48).  
32  
33  
34  
35  
36

### 37 **Secondary outcomes**

#### 38 *Health-related QoL*

39 Health-related QoL will be measured using the European Organization for Research and Treatment of  
40 Cancer Quality of Life Questionnaire Core 30 (EORTC QLQ-C30) (49) and the EuroQol 5 Dimensions  
41 Questionnaire (EQ-5D) (50). Regarding the EORTC QLQ-C30, the scores of the five functional scales  
42 and one global QoL scale are converted to a 0–100 scale (49). A higher score reflects a better level of  
43 functioning and better QoL. Tumor-specific complaints are measured using the disease-specific  
44 supplements EORTC QLQ-EN24 (51) for endometrial cancer, EORTC QLQ-OV28 (52) for ovarian  
45 cancer, EORTC QLQ-CX24 (53) for cervical cancer, and EORTC VU-34 (under development, phase 4)  
46 for vulvar cancer. The EORTC instruments (except EORTC VU-34) have been used in studies of  
47 gynecological cancer survivors, some of which were conducted in Norway (15, 16, 54). The disease-  
48 specific instruments measure symptoms related to the respective tumor types (urological, intestinal,  
49 sexual, and vaginal symptoms). The EQ-5D consists of two principal measurement components. The  
50 first is a descriptive system, which defines health-related QoL in terms of five dimensions (mobility,  
51 self-care, usual activities, pain/discomfort, and anxiety/depression), while the second is a visual  
52 analog scale (50).  
53  
54  
55  
56  
57  
58

#### 59 *Physical activity*

1  
2  
3 Self-reported physical activity will be assessed using the short form of the International Physical  
4 Activity Questionnaire (IPAQ-sf) according to the guidelines for data processing and analysis  
5 developed by the IPAQ group (55). Exercise stage/readiness to change will be assessed using one  
6 item: "Please indicate which alternative corresponds with your current physical activity level or your  
7 interest in physical activity." Responses are given on a five-point ordinal scale from the exercise  
8 stages of change assessment instrument (56), which is based on the trans-theoretical (stages of  
9 change) model (57). The scale represents five different stages of change, ranging from 1 = "Not  
10 physically active and I do not intend to become more physically active during the next 6 months"  
11 (pre-contemplation stage) to 5 = "Physically active and I have been so for more than 6 months"  
12 (maintenance stage). Step count data imported from the Garmin activity tracker into the LETSGO app  
13 will be compared with self-reports of physical activity.  
14  
15  
16  
17

#### 18 *Fear of cancer recurrence*

19  
20 The Health Worries subscale of the Impact of Cancer (IOC) scale will be used to assess fear of cancer  
21 recurrence (58). The module consists of six questions, including questions on worry about the future,  
22 worry about health due to cancer, and worry about recurrence. Items are scored on a five-point  
23 intensity scale ranging from 1 (strongly disagree) to 5 (strongly agree). Higher scores reflect greater  
24 fear of cancer. The IOC has been validated in oncology patients in oncology settings (58).  
25  
26

#### 27 *Health care utilization*

28  
29 Health care utilization will be assessed by asking patients about the frequency of their contact with  
30 their gynecologist and primary care physician and about how many health care visits were related to  
31 cancer. We will also assess how often the patients use additional care services (e.g., psychologist,  
32 rehabilitation course, physical therapist).  
33  
34

#### 35 *Health economic evaluation*

36 The EQ-5D is the generic measure preferred by the UK National Institute of Health and Care  
37 Excellence for cost-effectiveness and comparative purposes, which in turn has affected guidelines in  
38 several other countries, including Norway (50). Quality-adjusted life years (QALYs) will be calculated  
39 based on the area-under-the curve principle, taking into account both health-related QoL and  
40 survival of the patients during the 3-year follow-up period. Health care utilization at participating  
41 hospitals during the trial will be gathered for both groups. Health care utilization in other parts of the  
42 health care sector will be gathered from the following registry data sources: the Norwegian  
43 Prescription Database ([www.reseptregisteret.no](http://www.reseptregisteret.no)), which contains data on all medical prescriptions  
44 redeemed from Norwegian pharmacies; the Norwegian Patient Registry, which includes data on  
45 diagnostic information (ICD-10), medical treatment, length of hospital stay, and discharge data; the  
46 Municipal Patient and User Register (KPR); the individual-based care and care statistics registry  
47 (<https://helsedirektoratet.no/iplos-registeret>) for variables related to use of specialist and primary  
48 health care services; the Control and Payment of Health Reimbursement Database (<https://helfo.no/>)  
49 regarding GP visits, physiotherapy and health transportation; and the social security event database  
50 (FD-trygd). The costs of the intervention will be considered along with differences in resource use  
51 during follow-up and differences in QALYs to assess the incremental cost-effectiveness of the  
52 intervention compared to the control.  
53  
54  
55  
56  
57  
58

#### 59 *Biobanking*

1  
2  
3 Blood samples will be collected at defined time points, as described in Table 1. Standard operating  
4 procedures (SOP) have been established for blood and sera collections. The blood samples will be  
5 processed in components and stored at  $-80^{\circ}\text{C}$ . Three 6 ml EDTA samples will be collected and  
6 immediately centrifuged. From these, buffy coat (for isolation of genomic DNA) and plasma (for  
7 purification of circulating tumor DNA) will be isolated and stored in cryo tubes. Three SST II 5 ml  
8 serum Vacutainers will be collected and centrifuged after 30 min of coagulation time. Serum (for  
9 cytokine and metabolite analysis) will then be transferred to cryo tubes for storage. The consented  
10 SOP has been introduced at the participating hospitals, with an alternative protocol for the smaller  
11 hospitals without microcentrifuges.  
12  
13  
14

#### 15 16 *Other measurements*

17 Comorbidity will be assessed using the Self-Administered Comorbidity Questionnaire (SCQ) (59),  
18 which consists of 16 common and three optional medical conditions. Patients will be asked to  
19 indicate whether they have the condition, if they are receiving treatment for it, and if it limits their  
20 activities. For the present study, we will only ask whether the patients have any of the common  
21 conditions. The SCQ has well-established validity and reliability in Norwegian patients with chronic  
22 medical conditions (59, 60). Demographic information such as age, education, marital status, and  
23 treatment will be obtained from baseline questionnaires and medical records.  
24  
25  
26

#### 27 **Sample size calculation**

28 Sample size calculations were based on the primary outcome of interest. From a review of the  
29 available literature (48, 61), we anticipated that the change in mean value of the heiQ domain (self-  
30 monitoring and insight) from baseline to 12 months would be higher in the intervention group (62). A  
31 10% difference is considered clinically relevant (63). Assuming a common standard deviation of 1.4  
32 and using the customary significance level alpha of 5% and power of 80%, we determined that 343  
33 individuals in each group would be needed to reveal a clinically relevant difference of 10% or more.  
34 Accounting for a dropout rate of 10%, we determined that 377 would be needed in each group.  
35  
36  
37  
38

#### 39 **Statistical analyses**

40 Data will be analyzed after 1 and 3 years of follow-up. Data will be presented as counts and  
41 percentages (categorical variables) and mean and standard deviation or median and range for  
42 continuous data following normal or skewed distribution, respectively. Pairs of categorical variables  
43 will be compared using a chi-square test or, for small numbers, Fisher's exact test. Univariate analysis  
44 for comparison of continuous variables will be performed using a t-test for normally distributed data  
45 or the Mann-Whitney Wilcoxon test for variables with skewed distribution. Changes in the main  
46 outcome will be analyzed using generalized linear mixed models (GLMM) for repeated measures, as  
47 the outcomes are all continuous. As all included individuals will be assessed at several time points  
48 (baseline, 3, 6, 12, 24, and 36 months), statistical dependencies will exist. We will adjust for these  
49 using an unstructured covariance matrix if the model converges; if the model does not converge, we  
50 will fit a more specified covariance matrix. Type of hospital (intervention or reference), time  
51 (measurement point), and possible confounders identified when comparing patients at the  
52 intervention and control hospitals will be included as fixed factors. To account for added variation  
53 caused by enrolling participants at 10 different hospitals, we will include each hospital as a random  
54 factor. As GLMM models use all available observations, no imputation of missing data will be  
55 necessary. The results will be expressed as estimated means with 95% confidence intervals for each  
56  
57  
58  
59  
60

1  
2  
3 time point and type of hospital (intervention vs. control). Differences in means between the  
4 intervention and control groups for each assessment point will be estimated. Time to recurrence will  
5 be modeled using survival analysis methodologies. Specifically, we will use Kaplan-Meier curves to  
6 depict crude time to recurrence and a Cox model to estimate hazard ratios for recurrence. The  
7 economic analyses will include controlling for enrollment differences and sensitivity analyses,  
8 according to international guidelines (63).  
9  
10

### 11 **Patient involvement**

12  
13 We appointed a user panel of three women who had been treated for gynecological cancer and had  
14 no former experience with mHealth. The users have participated in several meetings since the initial  
15 planning of the study, and the resulting follow-up model has been adjusted based on their feedback  
16 and opinions. The users have read and commented on the protocol and have been involved in the  
17 development of the app. They have given their opinions on both the content of the app and the  
18 nurse-led consultations.  
19  
20  
21

### 22 **Ethics and dissemination**

23 The LETSGO study has been approved by the Regional Committee for Medical and Health Research  
24 Ethics of South East Norway (2019/11093). The protocol is registered at [www.clinicaltrials.gov](http://www.clinicaltrials.gov)  
25 (NCT04122235). The institutional review board and the data protection officer at each of the study  
26 sites have also approved the study. All patients will receive oral and written information about the  
27 study, and written informed consent will be collected prior to enrollment. An electronic case report  
28 form is used, and participants receive a unique subject number and subject identifier. Data are  
29 entered under this identification number onto a central database stored on secured servers. The  
30 servers are protected by firewalls and are patched and maintained according to best practice. The  
31 study investigators retain the right to access data. It is estimated that the study will be completed in  
32 2024, after which the data analysis and the results will be disseminated.  
33  
34  
35

36 **Authors' contributions:** IV, SB and ID conceived the study in collaboration with the other authors. IV  
37 was responsible for writing the protocol. M Skorstad, M Småstuen, KL, TW and LPF provided critical  
38 feedback during the conception of the study and the writing up of the protocol.  
39

40 **Funding statement:** The study is funded by the Norwegian Cancer Society (198057), the UNI  
41 Foundation (6845) and the South-Eastern Norway Regional Health Authorities (2019073).  
42

43 **Competing interests statement:** None declared.  
44  
45  
46  
47

- 48 1. Ferlay J, Colombet M, Soerjomataram I, Mathers C, Parkin DM, Piñeros M, et al. Estimating  
49 the global cancer incidence and mortality in 2018: GLOBOCAN sources and methods. *International  
50 journal of cancer*. 2019;144(8):1941-53.
- 51 2. Jacobs LA, Shulman LN. Follow-up care of cancer survivors: challenges and solutions. *Lancet  
52 Oncol*. 2017;18(1):e19-e29.
- 53 3. Leeson SC, Beaver K, Ezendam NPM, Macuks R, Martin-Hirsch PL, Miles T, et al. The future for  
54 follow-up of gynaecological cancer in Europe. Summary of available data and overview of ongoing  
55 trials. *Eur J Obstet Gynecol Reprod Biol*. 2017;210:376-80.
- 56 4. Coleman K, Austin BT, Brach C, Wagner EH. Evidence on the Chronic Care Model in the new  
57 millennium. *Health affairs (Project Hope)*. 2009;28(1):75-85.  
58  
59  
60

- 1
  - 2
  - 3
  - 4
  - 5
  - 6
  - 7
  - 8
  - 9
  - 10
  - 11
  - 12
  - 13
  - 14
  - 15
  - 16
  - 17
  - 18
  - 19
  - 20
  - 21
  - 22
  - 23
  - 24
  - 25
  - 26
  - 27
  - 28
  - 29
  - 30
  - 31
  - 32
  - 33
  - 34
  - 35
  - 36
  - 37
  - 38
  - 39
  - 40
  - 41
  - 42
  - 43
  - 44
  - 45
  - 46
  - 47
  - 48
  - 49
  - 50
  - 51
  - 52
  - 53
  - 54
  - 55
  - 56
  - 57
  - 58
  - 59
  - 60
5. Alfano CM, Mayer DK, Bhatia S, Maher J, Scott JM, Nekhlyudov L, et al. Implementing personalized pathways for cancer follow-up care in the United States: Proceedings from an American Cancer Society-American Society of Clinical Oncology summit. *CA Cancer J Clin*. 2019;69(3):234-47.
6. Beaver K, Williamson S, Sutton C, Hollingworth W, Gardner A, Allton B, et al. Comparing hospital and telephone follow-up for patients treated for stage-I endometrial cancer (ENDCAT trial): a randomised, multicentre, non-inferiority trial. *BJOG : an international journal of obstetrics and gynaecology*. 2017;124(1):150-60.
7. Jeppesen MM, Jensen PT, Hansen DG, Christensen RD, Mogensen O. Patient-initiated follow up affects fear of recurrence and healthcare use: a randomised trial in early-stage endometrial cancer. *BJOG : an international journal of obstetrics and gynaecology*. 2018.
8. Lanceley A, Berzuini C, Burnell M, Gessler S, Morris S, Ryan A, et al. Ovarian Cancer Follow-up: A Preliminary Comparison of 2 Approaches. *International journal of gynecological cancer : official journal of the International Gynecological Cancer Society*. 2017;27(1):59-68.
9. McCabe MS, Partridge AH, Grunfeld E, Hudson MM. Risk-based health care, the cancer survivor, the oncologist, and the primary care physician. *Seminars in oncology*. 2013;40(6):804-12.
10. Lanceley A, Fiander A, McCormack M, Bryant A. Follow-up protocols for women with cervical cancer after primary treatment. *The Cochrane database of systematic reviews*. 2013(11):Cd008767.
11. Vistad I, Cvancarova M, Fossa SD, Kristensen GB. Postradiotherapy morbidity in long-term survivors after locally advanced cervical cancer: how well do physicians' assessments agree with those of their patients? *IntJRadiatOncolBiolPhys*. 2008;71(5):1335-42.
12. Vistad I, Cvancarova M, Kristensen GB, Fossa SD. A study of chronic pelvic pain after radiotherapy in survivors of locally advanced cervical cancer. *J Cancer Surviv*. 2011;5(2):208-16.
13. Vistad I, Kristensen GB, Fossa SD, Dahl AA, Morkrid L. Intestinal malabsorption in long-term survivors of cervical cancer treated with radiotherapy. *IntJRadiatOncolBiolPhys*. 2009;73(4):1141-7.
14. Vistad I, Fossa S, Kristensen G, Dahl A. Chronic fatigue and its correlates in long-term survivors of cervical cancer treated with radiotherapy. *BJOG*. 2007.
15. Steen R, Dahl AA, Hess SL, Kiserud CE. A study of chronic fatigue in Norwegian cervical cancer survivors. *Gynecologic oncology*. 2017;146(3):630-5.
16. Liavaag AH, Dorum A, Fossa SD, Trope C, Dahl AA. Controlled study of fatigue, quality of life, and somatic and mental morbidity in epithelial ovarian cancer survivors: how lucky are the lucky ones? *JClinOncol*. 2007;25(15):2049-56.
17. Vistad I, Bjorge L, Solheim O, Fiane B, Sachse K, Tjugum J, et al. A national, prospective observational study of first recurrence after primary treatment for gynecological cancer in Norway. *Acta obstetrica et gynecologica Scandinavica*. 2017.
18. Rosenberg CA, Flanagan C, Brockstein B, Obel JC, Dragon LH, Merkel DE, et al. Promotion of self-management for post treatment cancer survivors: evaluation of a risk-adapted visit. *Journal of cancer survivorship : research and practice*. 2016;10(1):206-19.
19. Maunsell E, Lauzier S, Brunet J, Pelletier S, Osborne RH, Campbell HS. Health-related empowerment in cancer: validity of scales from the Health Education Impact Questionnaire. *Cancer*. 2014;120(20):3228-36.
20. Davy C, Bleasel J, Liu H, Tchan M, Ponniah S, Brown A. Effectiveness of chronic care models: opportunities for improving healthcare practice and health outcomes: a systematic review. *BMC Health Serv Res*. 2015;15:194.

- 1  
2  
3 21. Kumarakulasingam P, McDermott H, Patel N, Boutler L, Tincello DG, Peel D, et al.  
4 Acceptability and utilisation of patient-initiated follow-up for endometrial cancer amongst women  
5 from diverse ethnic and social backgrounds: A mixed methods study. *European journal of cancer*  
6 *care*. 2019;28(2):e12997.  
7
- 8 22. Thomaier L, Jewett P, Brown K, Gotlieb R, Teoh D, Blaes AH, et al. The associations between  
9 physical activity, neuropathy symptoms and health-related quality of life among gynecologic cancer  
10 survivors. *Gynecologic oncology*. 2020;158(2):361-5.  
11
- 12 23. Friedenreich CM, Cook LS, Wang Q, Kokts-Porietis RL, McNeil J, Ryder-Burbidge C, et al.  
13 Prospective Cohort Study of Pre- and Postdiagnosis Physical Activity and Endometrial Cancer Survival.  
14 *J Clin Oncol*. 2020:Jco2001336.  
15
- 16 24. Rock CL, Thomson C, Gansler T, Gapstur SM, McCullough ML, Patel AV, et al. American  
17 Cancer Society guideline for diet and physical activity for cancer prevention. *CA: A Cancer Journal for*  
18 *Clinicians*. 2020;70(4):245-71.  
19
- 20 25. von Gruenigen V, Waggoner S, Frasure H, Kavanagh M, Janata J, Rose P, et al. Lifestyle  
21 challenges in endometrial cancer survivorship. *Obstet Gynecol*. 2011;117(1):93-100.  
22
- 23 26. Samdal GB, Eide GE, Barth T, Williams G, Meland E. Effective behaviour change techniques  
24 for physical activity and healthy eating in overweight and obese adults; systematic review and meta-  
25 regression analyses. *The International Journal of Behavioral Nutrition and Physical Activity*.  
26 2017;14:42.  
27
- 28 27. Smits A, Lopes A, Das N, Bekkers R, Massuger L, Galaal K. The effect of lifestyle interventions  
29 on the quality of life of gynecological cancer survivors. A systematic review and meta-analysis.  
30 *Gynecol Oncol*. 2015;139:546-52.  
31
- 32 28. World Health Organization DoRHaR. mHealth. New horizons for health through mobile  
33 technologies 2011. Available from: [https://www.who.int/goe/publications/goe\\_mhealth\\_web.pdf](https://www.who.int/goe/publications/goe_mhealth_web.pdf).  
34
- 35 29. Schinköthe T. Individualized eHealth Support for Oncological Therapy Management. *Breast*  
36 *care (Basel, Switzerland)*. 2019;14(3):130-4.  
37
- 38 30. Purswani JM, Dicker AP, Champ CE, Cantor M, Ohri N. Big Data From Small Devices: The  
39 Future of Smartphones in Oncology. *Seminars in radiation oncology*. 2019;29(4):338-47.  
40
- 41 31. Furness K, Sarkies MN, Huggins CE, Croagh D, Haines TP. Impact of the Method of Delivering  
42 Electronic Health Behavior Change Interventions in Survivors of Cancer on Engagement, Health  
43 Behaviors, and Health Outcomes: Systematic Review and Meta-Analysis. *Journal of medical Internet*  
44 *research*. 2020;22(6):e16112.  
45
- 46 32. Triberti S, Savioni L, Sebrì V, Pravettoni G. eHealth for improving quality of life in breast  
47 cancer patients: A systematic review. *Cancer treatment reviews*. 2019;74:1-14.  
48
- 49 33. Denis F, Lethrosne C, Pourel N, Molinier O, Pointreau Y, Domont J, et al. Randomized Trial  
50 Comparing a Web-Mediated Follow-up With Routine Surveillance in Lung Cancer Patients. *J Natl*  
51 *Cancer Inst*. 2017;109(9).  
52
- 53 34. Lyu KX, Zhao J, Wang B, Xiong GX, Yang WQ, Liu QH, et al. Smartphone Application WeChat  
54 for Clinical Follow-up of Discharged Patients with Head and Neck Tumors: A Randomized Controlled  
55 Trial. *Chin Med J (Engl)*. 2016;129(23):2816-23.  
56
- 57 35. Ormel HL, van der Schoot GGF, Westerink NL, Sluiter WJ, Gietema JA, Walenkamp AME. Self-  
58 monitoring physical activity with a smartphone application in cancer patients: a randomized  
59 feasibility study (SMART-trial). *Supportive care in cancer : official journal of the Multinational*  
60 *Association of Supportive Care in Cancer*. 2018;26(11):3915-23.



- 1
- 2
- 3 36. Schrepf A, Clevenger L, Christensen D, DeGeest K, Bender D, Ahmed A, et al. Cortisol and  
4 inflammatory processes in ovarian cancer patients following primary treatment: relationships with  
5 depression, fatigue, and disability. *Brain, behavior, and immunity*. 2013;30 Suppl(0):S126-34.  
6
- 7 37. Duffy SA, Taylor JM, Terrell JE, Islam M, Li Y, Fowler KE, et al. Interleukin-6 predicts  
8 recurrence and survival among head and neck cancer patients. *Cancer*. 2008;113(4):750-7.  
9
- 10 38. Trompet S, de Craen AJ, Mooijaart S, Stott DJ, Ford I, Sattar N, et al. High Innate Production  
11 Capacity of Proinflammatory Cytokines Increases Risk for Death from Cancer: Results of the PROSPER  
12 Study. *Clinical cancer research : an official journal of the American Association for Cancer Research*.  
13 2009;15(24):7744-8.  
14
- 15 39. Kitson SJ, Lindsay J, Sivalingam VN, Lunt M, Ryan NAJ, Edmondson RJ, et al. The unrecognized  
16 burden of cardiovascular risk factors in women newly diagnosed with endometrial cancer: A  
17 prospective case control study. *Gynecologic oncology*. 2018;148(1):154-60.  
18
- 19 40. Bourke L, Homer KE, Thaha MA, Steed L, Rosario DJ, Robb KA, et al. Interventions for  
20 promoting habitual exercise in people living with and beyond cancer. *The Cochrane database of*  
21 *systematic reviews*. 2013(9):Cd010192.  
22
- 23 41. Turner RR, Steed L, Quirk H, Greasley RU, Saxton JM, Taylor SJ, et al. Interventions for  
24 promoting habitual exercise in people living with and beyond cancer. *The Cochrane database of*  
25 *systematic reviews*. 2018;9:Cd010192.  
26
- 27 42. Finne E, Glausch M, Exner AK, Sauzet O, Stolzel F, Seidel N. Behavior change techniques for  
28 increasing physical activity in cancer survivors: a systematic review and meta-analysis of randomized  
29 controlled trials. *Cancer management and research*. 2018;10:5125-43.  
30
- 31 43. Chan AW, Tetzlaff JM, Altman DG, Laupacis A, Gøtzsche PC, Krleža-Jerić K, et al. SPIRIT 2013  
32 statement: defining standard protocol items for clinical trials. *Ann Intern Med*. 2013;158(3):200-7.  
33
- 34 44. Vistad I, Moy BW, Salvesen HB, Liavaag AH. Follow-up routines in gynecological cancer - time  
35 for a change? *Acta ObstetGynecolScand*. 2011.  
36
- 37 45. Miller WR, Rollnick S. Meeting in the middle: motivational interviewing and self-  
38 determination theory. *Int J Behav Nutr Phys Act*. 2012;9:25.  
39
- 40 46. Kulis D, Bottomley A, Whittaker C, van de Poll-Franse LV, Darlington A, Holzner B, et al.  
41 PRM250 - The Use of The Eortc Item Library To Supplement Eortc Quality of Life Instruments. *Value*  
42 *in Health*. 2017;20(9):A775.  
43
- 44 47. Osborne RH, Elsworth GR, Whitfield K. The Health Education Impact Questionnaire (heiQ): an  
45 outcomes and evaluation measure for patient education and self-management interventions for  
46 people with chronic conditions. *Patient education and counseling*. 2007;66(2):192-201.  
47
- 48 48. Wahl AK, Osborne RH, Langeland E, Wentzel-Larsen T, Mengshoel AM, Ribu L, et al. Making  
49 robust decisions about the impact of health education programs: Psychometric evaluation of the  
50 Health Education Impact Questionnaire (heiQ) in diverse patient groups in Norway. *Patient education*  
51 *and counseling*. 2016;99(10):1733-8.  
52
- 53 49. Aaronson N, Ahmedzai S, Bergman B, Bullinger M, Cull A, Duez N, et al. The European  
54 Organization for Research and Treatment of Cancer QLQ-C30: a quality-of-life instrument for use in  
55 international clinical trials in oncology. *J Natl Cancer Inst*. 1993;85(5):365-76.  
56
- 57 50. Nord E. EuroQol: health-related quality of life measurement. Valuations of health states by  
58 the general public in Norway. *Health policy (Amsterdam, Netherlands)*. 1991;18(1):25-36.  
59
- 60 51. Stukan M, Zalewski K, Mardas M, Filarska D, Szajewski M, Kmiec A, et al. Independent  
psychometric validation of European Organization for Research and Treatment of Cancer Quality of

1  
2  
3 Life Questionnaire-Endometrial Cancer Module (EORTC QLQ-EN24). *Eur J Cancer Care (Engl)*.  
4 2017;Epub ahead of print.  
5

6 52. Greimel E, Bottomley A, Cull A, Waldenstrom A, Arraras J, Chauvenet L, et al. An international  
7 field study of the reliability and validity of a disease-specific questionnaire module (the QLQ-OV28) in  
8 assessing the quality of life of patients with ovarian cancer. . *Eur J Cancer*. 2003;39(10):1402-8.  
9

10 53. Greimel E, Kuljanic Vlasic K, Waldenstrom A, Duric V, Jensen P, Singer S, et al. The European  
11 Organization for Research and Treatment of Cancer (EORTC) Quality-of-Life questionnaire cervical  
12 cancer module: EORTC QLQ-CX24. . *Cancer*. 2006;107(8):1812-22.  
13

14 54. Knobel H, Loge JH, Brenne E, Fayers P, Hjermstad MJ, Kaasa S. The validity of EORTC QLQ-C30  
15 fatigue scale in advanced cancer patients and cancer survivors. *PalliatMed*. 2003;17(8):664-72.  
16

17 55. Ekelund U, Sepp H, Brage S, Becker W, Jakes R, Hennings M, et al. Criterion-related validity of  
18 the last 7-day, short form of the International Physical Activity Questionnaire in Swedish adults.  
19 *Public Health Nutr*. 2006;9(2):258-65.  
20

21 56. Nigg C, Riebe D. The transtheoretical model: research review of exercise behavior in older  
22 adults. In: Burbank P, Riebe D, editors. *Promoting exercise and behavior change in older adults:  
23 interventions with the transtheoretical model* New York: Springer; 2002. p. 147-80.  
24

25 57. Prochaska JO, DiClemente C, Norcross JC. In search of how people change. *American  
26 Psychologist*. 1992;47:1002-14.  
27

28 58. Zebrack BJ, Ganz PA, Bernaards CA, Petersen L, Abraham L. Assessing the impact of cancer:  
29 development of a new instrument for long-term survivors. *Psycho-oncology*. 2006;15(5):407-21.  
30

31 59. Hofso K, Miaskowski C, Bjordal K, Cooper BA, Rustoen T. Previous chemotherapy influences  
32 the symptom experience and quality of life of women with breast cancer prior to radiation therapy.  
33 *Cancer nursing*. 2012;35(3):167-77.  
34

35 60. Oksholm T, Rustoen T, Cooper B, Paul SM, Solberg S, Henriksen K, et al. Trajectories of  
36 Symptom Occurrence and Severity From Before Through Five Months After Lung Cancer Surgery.  
37 *Journal of pain and symptom management*. 2015;49(6):995-1015.  
38

39 61. Holmen H, Torbjørnsen A, Wahl AK, Jennum AK, Småstuen MC, Årsand E, et al. A Mobile  
40 Health Intervention for Self-Management and Lifestyle Change for Persons With Type 2 Diabetes,  
41 Part 2: One-Year Results From the Norwegian Randomized Controlled Trial RENEWING HEALTH. *JMIR  
42 mHealth and uHealth*. 2014;2(4):e57.  
43

44 62. Elsworth GR, Osborne RH. Percentile ranks and benchmark estimates of change for the  
45 Health Education Impact Questionnaire: Normative data from an Australian sample. *SAGE open  
46 medicine*. 2017;5:2050312117695716.  
47

48 63. Ramsey SD, Willke RJ, Glick H, Reed SD, Augustovski F, Jonsson B, et al. Cost-effectiveness  
49 analysis alongside clinical trials II-An ISPOR Good Research Practices Task Force report. *Value in  
50 health : the journal of the International Society for Pharmacoeconomics and Outcomes Research*.  
51 2015;18(2):161-72.  
52  
53  
54  
55  
56  
57  
58  
59  
60

**Table1.** Overview of all outcome measures and assessment times of the LETSGO study

| Outcomes                           | Measurement instrument                                           | Intervention hospitals |                 |    |                 |    |    |     |     |     |            |            |                | Reference hospitals |    |    |     |     |     |            |            |   |  |
|------------------------------------|------------------------------------------------------------------|------------------------|-----------------|----|-----------------|----|----|-----|-----|-----|------------|------------|----------------|---------------------|----|----|-----|-----|-----|------------|------------|---|--|
|                                    |                                                                  | B <sup>1</sup>         | 3w <sup>2</sup> | 6w | 3m <sup>3</sup> | 6m | 9m | 12m | 15m | 18m | 21/<br>30m | 24/<br>36m | B <sup>4</sup> | 3m                  | 6m | 9m | 12m | 15m | 18m | 21/<br>30m | 24/<br>36m |   |  |
| <b>Questionnaires</b>              |                                                                  |                        |                 |    |                 |    |    |     |     |     |            |            |                |                     |    |    |     |     |     |            |            |   |  |
| <i>Psychosocial outcomes</i>       |                                                                  |                        |                 |    |                 |    |    |     |     |     |            |            |                |                     |    |    |     |     |     |            |            |   |  |
| Patient empowerment                | heiQ <sup>6</sup>                                                | X                      |                 |    | X               | X  |    |     |     | X   |            |            |                | X                   | X  | X  | X   |     |     |            |            | X |  |
| Generic QOL <sup>5</sup>           | EQ-5D <sup>7</sup>                                               | X                      |                 |    | X               | X  |    |     |     | X   |            |            |                | X                   | X  | X  | X   |     |     |            |            | X |  |
| Disease specific QOL               | EORTC QLQ-C30 <sup>8</sup>                                       | X                      |                 |    | X               | X  |    |     |     | X   |            |            |                | X                   | X  | X  | X   |     |     |            |            | X |  |
| Tumor specific QOL                 | EORTC QLQ modules <sup>9</sup> CX24, EN24, OV28 and VU34         | X                      |                 |    | X               | X  |    |     |     | X   |            |            |                | X                   | X  | X  | X   |     |     |            |            | X |  |
| Cancer worry                       | IOC <sup>10</sup> worry subscale                                 | X                      |                 |    | X               | X  |    |     |     | X   |            |            |                | X                   | X  | X  | X   |     |     |            |            | X |  |
| Sexuality                          | SQOL-f <sup>11</sup> selected items                              | X                      |                 |    | X               | X  |    |     |     | X   |            |            |                | X                   | X  | X  | X   |     |     |            |            | X |  |
| Follow-up care                     | Study-specific questions                                         | X                      |                 |    | X               | X  |    |     |     | X   |            |            |                | X                   | X  | X  | X   |     |     |            |            | X |  |
| <i>Personal factors</i>            |                                                                  |                        |                 |    |                 |    |    |     |     |     |            |            |                |                     |    |    |     |     |     |            |            |   |  |
| Demographic variables              | Standard questions                                               | X                      |                 |    | X               | X  |    |     |     | X   |            |            |                | X                   | X  | X  | X   |     |     |            |            | X |  |
| Comorbidity                        | SCQ <sup>12</sup>                                                | X                      |                 |    | X               | X  |    |     |     | X   |            |            |                | X                   | X  | X  | X   |     |     |            |            | X |  |
| <i>Lifestyle factors</i>           |                                                                  |                        |                 |    |                 |    |    |     |     |     |            |            |                |                     |    |    |     |     |     |            |            |   |  |
| Physical activity                  | IPAQ-SF <sup>13</sup> , ESAI <sup>14</sup><br>Standard questions | X                      |                 |    | X               | X  |    |     |     | X   |            |            |                | X                   | X  | X  | X   |     |     |            |            | X |  |
| Alcohol use                        | Standard questions                                               | X                      |                 |    | X               | X  |    |     |     | X   |            |            |                | X                   | X  | X  | X   |     |     |            |            | X |  |
| Smoking                            | Standard questions                                               | X                      |                 |    | X               | X  |    |     |     | X   |            |            |                | X                   | X  | X  | X   |     |     |            |            | X |  |
| <i>Clinical factors</i>            |                                                                  |                        |                 |    |                 |    |    |     |     |     |            |            |                |                     |    |    |     |     |     |            |            |   |  |
| Medical history                    | eCRF <sup>15</sup><br>eCRF                                       | X                      |                 |    |                 |    |    |     |     |     |            |            |                |                     | X  |    |     |     |     |            |            |   |  |
| Medication                         | Blood pressure, pulse,<br>weight                                 | X                      |                 |    |                 |    |    |     |     |     |            |            |                |                     | X  |    |     |     |     |            |            |   |  |
| Vital signs                        |                                                                  | X                      |                 | X  |                 | X  |    |     |     | X   |            | X          |                | X                   |    |    |     |     |     |            |            |   |  |
| Performance status                 | ECOG <sup>16</sup> status                                        | X                      |                 | X  |                 | X  |    |     |     | X   |            |            |                | X                   |    |    |     |     |     |            |            |   |  |
| Gynecological examination          | NA <sup>17</sup>                                                 |                        |                 |    | X               |    |    | X   |     | X   |            | X          |                |                     | X  | X  | X   | X   | X   | X          | X          | X |  |
| <b>LETSGO intervention (nurse)</b> |                                                                  |                        |                 |    |                 |    |    |     |     |     |            |            |                |                     |    |    |     |     |     |            |            |   |  |
| Introduction to LETSGO-app         | NA                                                               |                        |                 | X  |                 | X  |    |     |     | X   |            |            |                | X                   |    |    |     |     |     |            |            |   |  |
| Assessment of rehabilitation needs | NA                                                               |                        |                 | X  |                 | X  |    |     |     | X   |            |            |                | X                   |    |    |     |     |     |            |            |   |  |

|    |                                              |                      |   |   |   |   |   |   |   |   |                 |   |   |   |   |   |   |   |   |                 |
|----|----------------------------------------------|----------------------|---|---|---|---|---|---|---|---|-----------------|---|---|---|---|---|---|---|---|-----------------|
| 1  | <b>Set goals for physical activity</b>       | NA                   |   |   | X |   |   |   |   |   |                 |   |   |   |   |   |   |   |   |                 |
| 2  | <b>Follow up goals for physical activity</b> | NA                   |   |   |   | X |   | X |   | X |                 | X |   |   |   |   |   |   |   |                 |
| 3  | <b>Motivating interview</b>                  | NA                   | X |   | X |   | X | X |   | X |                 | X |   |   |   |   |   |   |   |                 |
| 4  | <b>Assessment of late-effects</b>            | Study-specific chart |   |   |   | X |   | X |   | X |                 | X |   |   |   |   |   |   |   |                 |
| 5  | <b>Visits at out-patient clinic</b>          | NA                   |   |   |   |   |   |   |   |   |                 |   |   |   |   |   |   |   |   |                 |
| 6  | <b>Low risk group intervention</b>           |                      | X | X |   | X |   | X |   |   |                 |   |   |   |   |   |   |   |   |                 |
| 7  | <b>Medium/high risk group intervention</b>   |                      | X | X |   | X |   | X |   | X |                 | X |   |   |   |   |   |   |   |                 |
| 8  | <b>Reference group (all)</b>                 |                      |   |   |   |   |   |   |   |   |                 |   | X | X | X | X | X | X | X | X               |
| 9  | <b>Biological factors</b>                    |                      |   |   |   |   |   |   |   |   |                 |   |   |   |   |   |   |   |   |                 |
| 10 | <b>General laboratory</b>                    | Blood                | X |   |   | X | X |   | X |   | X               | X | X | X |   | X |   |   |   | X               |
| 11 | <b>Biomarkers</b>                            | Blood                |   |   |   | X |   | X |   |   | X <sup>18</sup> | X | X |   | X |   |   |   |   | X <sup>18</sup> |

<sup>1</sup>Baseline; <sup>2</sup>Weeks; <sup>3</sup>Months; <sup>4</sup>At reference hospitals, first questionnaire/blood tests may be collected at 3 months; <sup>5</sup>Quality of Life; <sup>6</sup>Health Education Impact Questionnaire; <sup>7</sup>EuroQol 5 dimensions questionnaire; <sup>8</sup>The European Organization for Research and Treatment of Cancer Quality of Life Questionnaire Core 30; <sup>9</sup>Modules: cervix, endometrium, ovarian, vulvar; <sup>10</sup>The Impact of Cancer Questionnaire; <sup>11</sup>Sexual Quality of Life—Female Questionnaire; <sup>12</sup>Self-Administered Comorbidity Questionnaire; <sup>13</sup>Physical Activity Questionnaire Short-Form <sup>14</sup>Exercise Stage Assessment Instrument; <sup>15</sup>Electronic Case Report Form; <sup>16</sup>Eastern Oncology Cooperative Group; <sup>17</sup>Not applicable; <sup>18</sup>Biomarkers at 3, 12 and 36 months.

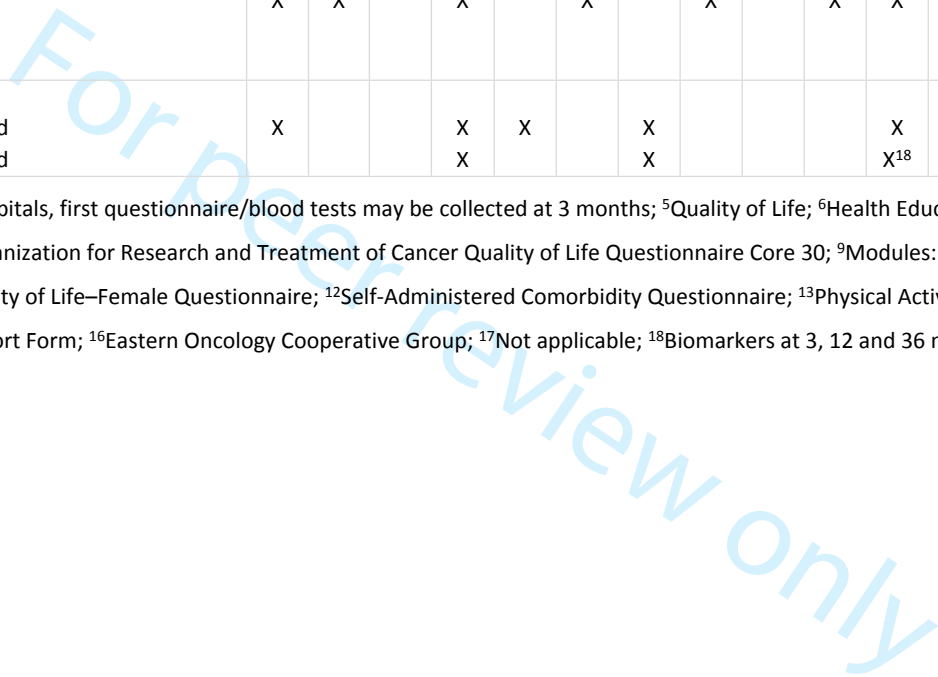

1  
2  
3  
4  
5  
6  
7  
8  
9  
10  
11  
12  
13  
14  
15  
16  
17  
18  
19  
20  
21  
22  
23  
24  
25  
26  
27  
28  
29  
30  
31  
32  
33  
34  
35  
36  
37  
38  
39  
40  
41  
42  
43  
44  
45  
46  
47  
48  
49  
50  
51  
52  
53  
54  
55  
56  
57  
58  
59  
60

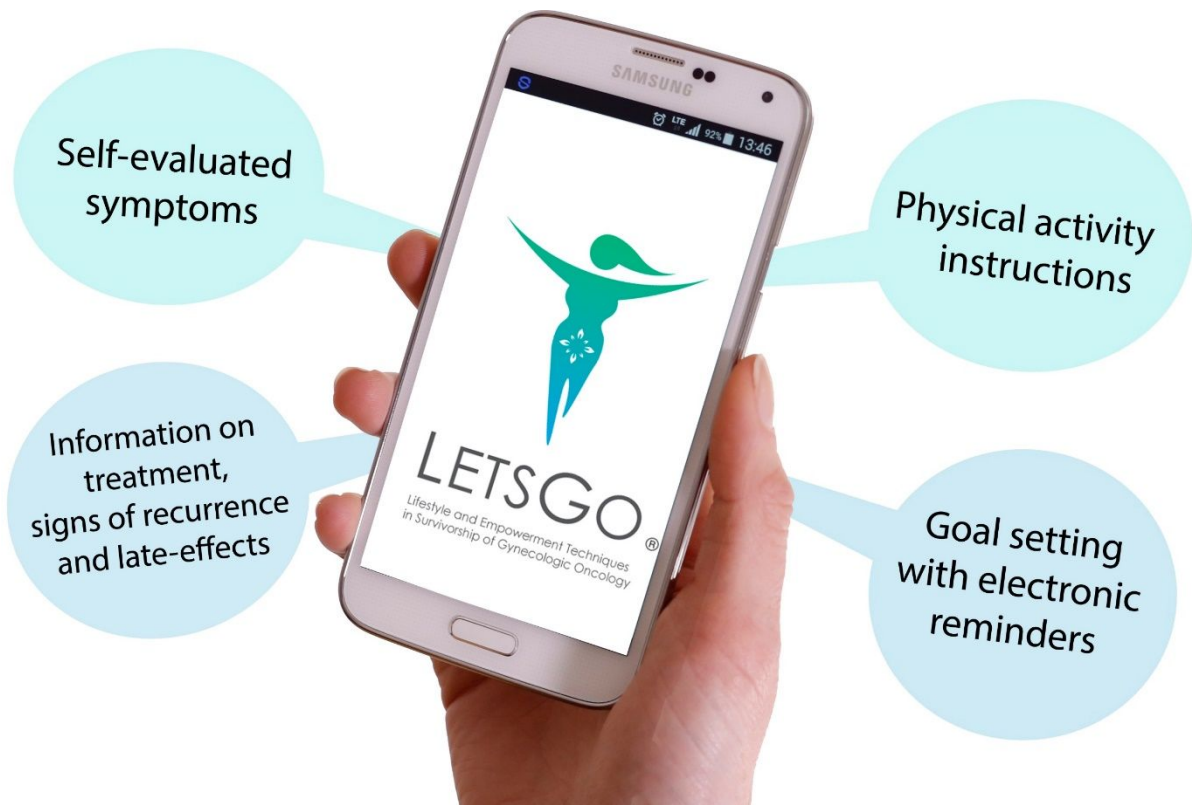

Figure 1. The LETSGO-app (©A.Gjoerv) or Figure 1. The LETSGO-app (Created by A. Gjoerv)

Preview only

# BMJ Open

**Lifestyle and Empowerment Techniques in Survivorship of Gynecologic Oncology (LETSGO study).  
A study protocol for a multicenter longitudinal intervention study using mobile health technology and biobanking.**

|                                 |                                                                                                                                                                                                                                                                                                                                                                                                                                                                                                                                                                                                                                                                                                                                                                                                                                                                                                                                             |
|---------------------------------|---------------------------------------------------------------------------------------------------------------------------------------------------------------------------------------------------------------------------------------------------------------------------------------------------------------------------------------------------------------------------------------------------------------------------------------------------------------------------------------------------------------------------------------------------------------------------------------------------------------------------------------------------------------------------------------------------------------------------------------------------------------------------------------------------------------------------------------------------------------------------------------------------------------------------------------------|
| Journal:                        | <i>BMJ Open</i>                                                                                                                                                                                                                                                                                                                                                                                                                                                                                                                                                                                                                                                                                                                                                                                                                                                                                                                             |
| Manuscript ID                   | bmjopen-2021-050930.R1                                                                                                                                                                                                                                                                                                                                                                                                                                                                                                                                                                                                                                                                                                                                                                                                                                                                                                                      |
| Article Type:                   | Protocol                                                                                                                                                                                                                                                                                                                                                                                                                                                                                                                                                                                                                                                                                                                                                                                                                                                                                                                                    |
| Date Submitted by the Author:   | 15-Jun-2021                                                                                                                                                                                                                                                                                                                                                                                                                                                                                                                                                                                                                                                                                                                                                                                                                                                                                                                                 |
| Complete List of Authors:       | Vistad, Ingvild ; Sorlandet Hospital Kristiansand, Obstetric and gynecology ; University of Bergen, Clinical department 2<br>Skorstad, Mette; Sorlandet Hospital Kristiansand, Obstetric and gynecology<br>Demmelmaier, Ingrid; Uppsala Universitet, Department of Public Health and Caring Sciences, Lifestyle and rehabilitation in long-term illness<br>Småstuen, Milada; Oslo Metropolitan University, Department of Nursing and Health Promotion<br>Lindemann, Kristina; Oslo University Hospital, Dept. of Gynaecologic oncology; University of Oslo, Institute of Clinical Medicine<br>Wisløff, Torbjørn; UiT The Arctic University of Norway, Department of Community Medicine<br>van de Poll-Franse, Lonneke; Netherlands Cancer Institute, Psychosocial research and epidemiology; IKNL, Research, Netherlands Comprehensive Cancer Organization<br>Berntsen, Sveinung; University of Agder, Faculty of Health and Sport Sciences |
| <b>Primary Subject Heading</b>: | Oncology                                                                                                                                                                                                                                                                                                                                                                                                                                                                                                                                                                                                                                                                                                                                                                                                                                                                                                                                    |
| Secondary Subject Heading:      | Obstetrics and gynaecology                                                                                                                                                                                                                                                                                                                                                                                                                                                                                                                                                                                                                                                                                                                                                                                                                                                                                                                  |
| Keywords:                       | Gynaecological oncology < GYNAECOLOGY, Quality in health care < HEALTH SERVICES ADMINISTRATION & MANAGEMENT, Information technology < BIOTECHNOLOGY & BIOINFORMATICS, Change management < HEALTH SERVICES ADMINISTRATION & MANAGEMENT, Health economics < HEALTH SERVICES ADMINISTRATION & MANAGEMENT, Protocols & guidelines < HEALTH SERVICES ADMINISTRATION & MANAGEMENT                                                                                                                                                                                                                                                                                                                                                                                                                                                                                                                                                                 |
|                                 |                                                                                                                                                                                                                                                                                                                                                                                                                                                                                                                                                                                                                                                                                                                                                                                                                                                                                                                                             |

1  
2  
3  
4  
5  
6  
7  
8  
9  
10  
11  
12  
13  
14  
15  
16  
17  
18  
19  
20  
21  
22  
23  
24  
25  
26  
27  
28  
29  
30  
31  
32  
33  
34  
35  
36  
37  
38  
39  
40  
41  
42  
43  
44  
45  
46  
47  
48  
49  
50  
51  
52  
53  
54  
55  
56  
57  
58  
59  
60

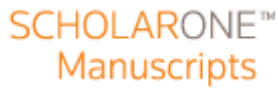



I, the Submitting Author has the right to grant and does grant on behalf of all authors of the Work (as defined in the below author licence), an exclusive licence and/or a non-exclusive licence for contributions from authors who are: i) UK Crown employees; ii) where BMJ has agreed a CC-BY licence shall apply, and/or iii) in accordance with the terms applicable for US Federal Government officers or employees acting as part of their official duties; on a worldwide, perpetual, irrevocable, royalty-free basis to BMJ Publishing Group Ltd ("BMJ") its licensees and where the relevant Journal is co-owned by BMJ to the co-owners of the Journal, to publish the Work in this journal and any other BMJ products and to exploit all rights, as set out in our [licence](#).

The Submitting Author accepts and understands that any supply made under these terms is made by BMJ to the Submitting Author unless you are acting as an employee on behalf of your employer or a postgraduate student of an affiliated institution which is paying any applicable article publishing charge ("APC") for Open Access articles. Where the Submitting Author wishes to make the Work available on an Open Access basis (and intends to pay the relevant APC), the terms of reuse of such Open Access shall be governed by a Creative Commons licence – details of these licences and which [Creative Commons](#) licence will apply to this Work are set out in our licence referred to above.

Other than as permitted in any relevant BMJ Author's Self Archiving Policies, I confirm this Work has not been accepted for publication elsewhere, is not being considered for publication elsewhere and does not duplicate material already published. I confirm all authors consent to publication of this Work and authorise the granting of this licence.



# Lifestyle and Empowerment Techniques in Survivorship of Gynecologic Oncology (LETSGO study).

## A study protocol for a multicenter longitudinal intervention study using mobile health technology and biobanking.

Ingvild Vistad<sup>1,2</sup>, Mette Skorstad<sup>1</sup>, Ingrid Demmelmaier<sup>3,4</sup>, Milada Småstuen<sup>5</sup>, Kristina Lindemann<sup>6,7</sup>, Torbjørn Wisløff<sup>8,9</sup>, Lonneke van de Poll Franse<sup>10,11,12</sup>, Sveinung Berntsen<sup>4</sup>.

<sup>1</sup> Dept. of Gynaecology and Obstetrics, Sorlandet Hospital HF Kristiansand, Norway

<sup>2</sup> Clinical Institute II, Medical department, University of Bergen, Bergen, Norway

<sup>3</sup> Department of Public Health and Caring Sciences, Uppsala University, Uppsala, Sweden

<sup>4</sup> Department of Sport Science and Physical Education, Faculty of Health and Sport Sciences, University of Agder, Kristiansand, Norway

<sup>5</sup> Department of Nursing and Health promotion, Faculty of Health Sciences, Oslo Metropolitan University, Oslo, Norway

<sup>6</sup> Dept. of Gynaecologic oncology, Division of Cancer Medicine, Oslo University Hospital, Oslo, Norway

<sup>7</sup> Faculty of Medicine, Institute of Clinical Medicine, University of Oslo, Oslo, Norway

<sup>8</sup> Department of Community Medicine, Arctic University of Tromsø, Tromsø, Norway

<sup>9</sup> Department of Health Management and Health Economics, University of Oslo, Oslo, Norway

<sup>10</sup> Netherlands Comprehensive Cancer Organisation, Utrecht, The Netherlands

<sup>11</sup> CoRPS - Center of Research on Psychology in Somatic diseases, Department of Medical and Clinical psychology, Tilburg University, Tilburg, The Netherlands

<sup>12</sup> Division of Psychosocial Research & Epidemiology, The Netherlands Cancer Institute, Amsterdam, The Netherlands

<sup>1</sup> Corresponding author:

Ingvild Vistad, MD, PhD, Department of Obstetrics and Gynecology, Sorlandet Hospital HF, Service Box 416, 4604 Kristiansand, Norway; Tel.: +47 38 07 30 70; E-mail: ingvild.vistad@sshf.no

## Introduction

The number of gynecological cancer survivors is increasing and there is a need for a more sustainable model of follow-up care. Today's follow-up model is time-consuming and patients have reported unmet needs regarding information about their cancer and strategies for managing the consequences of treatment. The main aim of this study is to assess health-related empowerment—in terms of patient education, psychosocial support, and promotion of physical activity—in a new follow-up model by comparing it to standard follow-up in a quasi-randomized study involving intervention hospitals and control hospitals.

## Methods and analysis

At the intervention hospitals, patients will be stratified by risk of recurrence and late effects to either 1 or 3 years' follow-up. Nurses will replace doctors in half of the follow-up visits and focus in particular on patient education, self-management, and physical activity. They will provide patients with information and guide them in goal setting and action planning. These measures will be reinforced by a smartphone application for monitoring symptoms and promoting physical activity. At the control hospitals, patients will be included in the standard follow-up program. All patients will be asked to complete questionnaires at baseline and after 3, 6, 12, 24, and 36 months. Blood samples will be collected for biobanking at 3, 12, and 36 months. The primary outcome is health-related empowerment. Secondary outcomes include health-related quality of life, adherence to physical activity recommendations, time to recurrence, health care costs, and changes in biomarkers. Changes in these outcomes will be analyzed using generalized linear mixed models for repeated measures. Type of hospital (intervention or reference), time (measurement point), and possible confounders will be included as fixed factors.

## Ethics and dissemination

The study is approved by the Regional Committee for Medical Research Ethics (2019/11093). Dissemination of findings will occur at the local, national, and international levels.

**Trial registration number** NCT04122235

## Strengths and limitations of this study

- LETSGO is the first multisite, comprehensive clinical study to investigate nurse-led patient education reinforced with a smartphone application compared to traditional follow-up after gynecological cancer assessed with validated questionnaires.
- The longitudinal quasi-randomized design reflects daily clinical practice and allows us to estimate possible changes over time defining the temporal sequence of changes and providing stronger evidence for causality.
- The study has a translational approach with the establishment of a longitudinal biobank of samples of blood and blood components.
- A health economic evaluation will explore if the new follow-up program results in fewer scheduled appointments at the intervention hospitals, which may have an effect on resource utilization.
- The primary limitation of this study is the quasi-randomized design which may lead to imbalances in prognostic factors between the groups.

## Introduction

The current global yearly incidence of gynecological cancer is almost 1.3 million cases and is expected to increase by 44.6% by 2040[1]. The increase in prevalence will pose challenges for post-treatment follow-up models, which are currently time-consuming, expensive, and lack evidence of efficacy regarding survival and quality of life (QoL)[2]. Traditional hospital-based follow-up has been criticized for being too focused on the detection of recurrences and less attentive to physical and psychological rehabilitation after cancer treatment[3, 4]. Consequently, survivors report unmet needs relating to their cancer treatment, comorbidities, and economic and family concerns[5]. A small number of clinical and economic evaluations of alternative approaches to survivorship care after gynecological cancer have been reported to date[3], including three small randomized controlled trials (RCTs)[6-8]. These RCTs evaluate nurse-led telephone follow-up and comparisons between more intensive and less intensive follow-up procedures[3, 6-8]. Another alternative model for delivering care in cancer survivorship is the risk-stratification model, whereby patients are stratified according to their risk of developing late effects of treatment or cancer recurrence[9].

Gynecological cancer survivors report a high prevalence of treatment-related symptoms that can affect their QoL. The most frequently reported symptoms are fatigue, neuropathy, lymphedema, sexual dysfunction, cognitive dysfunction, anxiety, and depression[10-17]. Some of these symptoms may also be signs of disease recurrence[18]. Despite having symptoms at recurrence, it is shown that many patients fail to make an appointment earlier than scheduled [18]. This underlines the importance of providing education on alarm symptoms and motivating patients to actively manage their condition after gynecological cancer treatment[2, 19]. In a cancer survivorship context, health-related empowerment refers to an individual's feelings of being able to manage the challenges of the cancer experience and of having a sense of control over their own life[20]. The facilitation of empowerment through education and self-management strategies to enhance problem-solving skills, action planning and self-efficacy are components of the chronic care model developed by the MacColl Institute for Healthcare Innovation[2, 19, 21].

A follow-up model designed to increase health-related empowerment provides opportunities for highlighting patients' lifestyle in terms of health behaviors, such as physical activity. It is well known that physical activity provides multiple psychological and physiological benefits after a cancer diagnosis and is associated with increased health-related QoL, as well as a reduced risk of cancer morbidity[22, 23]. International health authorities recommend that all adults, including cancer survivors, should engage in moderate-intensity physical activity for a minimum of 150 min per week or vigorous-intensity physical activity for at least 75 min per week[24]. Although patients often request information about health-promoting strategies, many gynecological cancer survivors find it difficult to alter their lifestyles without external motivation[25]. In this context, research has consistently shown that interventions targeting patient autonomy and self-regulation (the ability to act in one's own long-term best interest) can promote physical activity behavior changes[26].

Mobile health (mHealth) is a subset of the broader concept of electronic health and refers to the use of mobile devices to support the delivery of medical and public health care to individuals and populations. In recent years, mobile web applications (apps) have increasingly been used to promote chronic disease management, including patients with cancer[27-29]. Regular reporting of a limited

1  
2  
3 set of symptoms has been found to be an accurate and cost-effective way of detecting recurrences  
4 and treatment-related late effects in patients with cancer in the lungs and breasts[30, 31].  
5 Smartphone apps have also been used as tools to enhance physical function and physical activity in  
6 cancer patients[32, 33].  
7  
8

9  
10 Studies indicate that pro-inflammatory cytokines are important in the pathophysiology of cancer  
11 symptoms, including psycho-behavioral symptoms[34] and that chronic inflammation increases the  
12 risk of cancer-related comorbidity and mortality[34-36]. Furthermore, inflammation and metabolic  
13 status have been linked to metabolic syndrome, which is closely related to the incidence of  
14 endometrial cancer[37]. Despite growing evidence of the role of biomarkers in cancer-related  
15 morbidity and QoL, studies investigating the contribution of biomarkers to gynecological cancer  
16 survivorship are limited.  
17  
18

19  
20 The aim of the LETSGO study is to evaluate a new program for follow-up after gynecological cancer.  
21 The program is based on risk stratification and patient self-management and includes nurse-led  
22 coaching, mHealth technology, and promotion of physical activity. It will be compared to the  
23 standard follow-up program, which follows Norwegian guidelines.  
24

25 The objectives are to

- 26 (1) compare patient empowerment (primary outcome) in patients attending intervention hospitals  
27 and those attending control hospitals at 12 months,
- 28 (2) compare health-related QoL between the intervention group and the control group,
- 29 (3) compare physical activity between the intervention group and the control group,
- 30 (4) compare time to detection of recurrence between the intervention group and the control group,
- 31 (5) assess whether the intervention is cost-effective compared to current practice, and
- 32 (6) identify relationships between self-management, physical activity, and various biomarkers.  
33  
34  
35

## 36 **Methods**

37  
38 The study follows the SPIRIT (Standard Protocol Items: Recommendations for clinical trials) checklist  
39 (Supplementary file 1)[38] and World Health Organization Trial Registration Data Set (Supplementary  
40 file 2).  
41  
42

43 Table 1 approximately here  
44

## 45 **Design**

46 The LETSGO study is a longitudinal, quasi-experimental multicenter clinical study comparing a new  
47 follow-up program at intervention hospitals with the standard follow-up program at control  
48 hospitals.  
49  
50

## 51 **The LETSGO follow-up model**

52 Our research group has developed a follow-up program based on the principles of the risk-  
53 stratification model and the chronic care model comprising a 1-year hospital follow-up for low-risk  
54 gynecological cancer patients or a 3-year follow-up for medium/high-risk patients. For half of the  
55 consultations, nurses will replace the doctors and will use evidence-based behavior change  
56 techniques to coach the cancer patients on how to take a more active role in managing their health  
57 conditions[39-41]. The nurses will focus on information on symptoms of recurrence, management of  
58 late effects, goal setting for physical activity, action planning, review of goal setting, and monitoring  
59  
60

1  
2  
3 of physical activity. The techniques will be reinforced with the multifunctional Lifestyle and Self-  
4 Management Techniques in Survivorship of Gynecologic Oncology (LETSGO) app with several  
5 modules (Figure 1). The LETSGO follow-up model has been pilot-tested in 12 gynecological cancer  
6 patients (NCT03453788).  
7  
8

### 9 **Study population**

10 We have begun to recruit a cohort of women who have completed treatment for gynecological  
11 cancer. The study is being conducted at 10 Norwegian hospitals (five intervention and five reference  
12 hospitals). University hospitals, regional hospitals and all Norwegian health regions are equally  
13 distributed in both groups, and their standard follow-up routines do not differ[42]. Participating  
14 hospitals are listed at [www.clinicaltrials.gov](http://www.clinicaltrials.gov). Medical specialists and study nurses will inform eligible  
15 patients about the study before the first follow-up visit after primary treatment has been completed.  
16  
17  
18

### 19 *Inclusion criteria*

20 Eligible participants (1) have histologically verified cervical cancer (restricted to squamous cell  
21 carcinoma, adenocarcinoma, or adenosquamous carcinoma), endometrial cancer, ovarian cancer  
22 (restricted to epithelial type), or vulvar cancer; (2) have completed primary standard treatment and  
23 are scheduled for follow-up; (3) are able (both physically and cognitively) to complete patient-  
24 reported outcome measures independently in Norwegian; (4) are  $\geq 18$  years; and (5) are able to  
25 provide informed consent.  
26  
27  
28

### 29 *Exclusion criteria*

30 Patients are ineligible if they (1) are participating in a clinical treatment trial; (2) are on intravenous  
31 maintenance treatment (e.g., bevacizumab); (3) are cervical cancer patients who have been treated  
32 with trachelectomy.  
33  
34  
35

### 36 **Study timeline**

37 Enrollment of participants started in November 2019 and is due to close in December 2024 or after  
38 accrual and the last patient visit is completed  
39  
40  
41

### 42 **Intervention hospitals**

#### 43 *Nurse-led consultations*

44 The low-risk group will be followed up for 1 year and the medium/high-risk group for 3 years (Table  
45 1). Before entering the follow-up program, the participants will be assigned to either the low-risk  
46 group or the medium/high-risk group according to predefined risk criteria. The low-risk group  
47 includes patients with (1) cervical cancer FIGO (International Federation of Gynecology and  
48 Obstetrics) stage IA1 with negative cytology and human papilloma virus status at 9 months after  
49 treatment; (2) endometrial cancer FIGO stage IA or B with endometrioid adenocarcinoma grade 1  
50 and no adjuvant therapy; or (3) ovarian cancer FIGO stage IA and no adjuvant therapy. The  
51 medium/high-risk group includes patients with (1) cervical cancer FIGO stage IA1 with positive  
52 cytology and human papilloma virus status at 9 months after treatment or any other FIGO stage; (2)  
53 endometrial cancer at any stage except FIGO stage IA/B with endometrioid adenocarcinoma grade 1;  
54 (3) ovarian cancer FIGO stage IA with adjuvant chemotherapy or FIGO stage IB to IVB; or (4) vulvar  
55 cancer at any stage.  
56  
57  
58  
59  
60

1  
2  
3  
4 The first visit will take place 3-5 weeks after treatment ends (chemotherapy, radiotherapy or surgery  
5 completion). A second nurse-led visit will take place 7-8 weeks after treatment. Thereafter, patients  
6 will alternate between nurse- and doctor-led consultations, as depicted in Figure 1. At the 3- to 5-  
7 week visit, the nurse will assess the women's physical and emotional status, as well as aspects of her  
8 lifestyle and family environment. Patients with smartphones or tablets will be introduced to the  
9 LETSGO app (see below), and patients without smartphones or tablets will be provided with an  
10 information booklet containing identical information to that contained in the app. At the second  
11 nurse-led visit, the nurse will explore the patient's previous physical activity and their motivation for  
12 future physical activity, using an autonomous supportive communication style inspired by  
13 motivational interviewing [43]. In addition, the nurse will work with the patient to set individualized  
14 goals for physical activity in line with the patients' motivation and barriers. To encourage physical  
15 activity, the patients will receive a Garmin activity tracker and will be instructed to wear it all day  
16 through the entire study period. The step count is displayed in the LETSGO app when the patient's  
17 mobile phone is connected to the activity tracker. Goals will be reviewed and adapted accordingly at  
18 subsequent nurse-led visits.  
19  
20  
21  
22  
23  
24

25  
26 The patients at the intervention hospitals will have access to the LETSGO app throughout the 3-year  
27 study period, irrespective of their risk group (except cervical cancer patients in the low-risk group  
28 who have been treated with conization only, to avoid unnecessary fear of cancer recurrence in this  
29 low-risk population). At the final follow-up visit (at 12 months or 36 months, depending on the risk  
30 group), the nurse will emphasize the importance of being attentive to symptoms as signs of  
31 recurrence and of a healthy lifestyle for well-being. The patients will receive written information on  
32 whom to contact if they experience treatment-related side effects or suspect disease recurrence. A  
33 summary of the patient's treatment, potential side effects, and symptoms of potential recurrence  
34 will be sent to the patient's responsible general practitioner. The nurses involved in the study are  
35 familiar with gynecological cancer patients. They have participated in a 2-day intensive course  
36 covering relevant subjects, including gynecological cancer treatment, physical and mental treatment-  
37 related symptoms, symptoms of recurrence, benefits of physical activity, autonomous supportive  
38 communication style, and motivation and individualized goal setting for physical activity. The nurses'  
39 education was reinforced by an electronic learning program with modules covering these subjects,  
40 which they were required to complete before the course.  
41  
42  
43  
44  
45

#### 46 *The LETSGO app*

47 The app is available for smartphones and tablets. It contains information on the different  
48 gynecological cancers, as well as lifestyle information and advice. It is distributed through Apple  
49 Store and Google Play, and a personal code is required to open the study version.

50 The app consists of the following modules (Figure 1):  
51  
52  
53

- 54 1. Disease-specific information (written and audiovisual) on ovarian, uterine, cervical, or vulvar  
55 cancer, signs of recurrence, and late effects after treatment.
- 56 2. General lifestyle information.
- 57 3. Physical activity exercises and programs with instructions (written and audiovisual) for both  
58 beginners and experienced persons.  
59  
60

- 1
- 2
- 3
4. Physical activity goal setting: Participants will be asked to define a goal for the week (e.g., a 30-minute walk twice a week or strength exercise in a health studio three times a week).
- 5
- 6 5. Monitoring of symptoms of recurrence: Once monthly, the participants will be asked to rate 10
- 7 symptoms that may indicate recurrence.
- 8
- 9

10 Patient-reported outcome studies have shown that the most frequent symptoms of recurrence are  
11 pain and fatigue for all gynecological cancers and bleeding for endometrial and cervical cancer [18].  
12 To cover these symptoms, we have selected relevant items from the European Organisation of  
13 Research and Treatment of Cancer (EORTC) item library [44], adjusted to each cancer type. The 10  
14 EORTC items in the app refer to the preceding week. For instance, patients treated for endometrial  
15 or cervical cancer will be asked, "Have you had abnormal bleeding from your vagina?" Each  
16 participant will rate the severity of their symptoms in the preceding week from 0 (not at all) to 3  
17 (very much). If a predefined threshold is reached, the participant will receive an alert on their phone  
18 or tablet informing her that the answer given may indicate recurrence and advising her to phone the  
19 pre-saved telephone number of the gynecological outpatient clinic. We anticipate that some  
20 participants may refrain from making contact. Therefore, the database will be checked for flags at  
21 regular time points by the project data manager. Patient visits and imaging will be brought forward if  
22 recurrence is suspected.

### 23 **Control hospitals**

24 Patients will receive standard follow-up according to current guidelines. Standard follow-up in  
25 Norway consists of clinical examination with vaginal ultrasound three to four times a year during the  
26 first 2 years, twice a year for the next 3 years, and annually thereafter, depending on the  
27 recommendations of the patient's doctor.

### 28 **Data collection**

29 Data will be collected using medical records, patient registries, validated questionnaires (electronic  
30 or written), and blood samples. Primary and secondary outcomes will be measured for all  
31 participants at enrollment (for baseline data) and again at 3, 6, 12, 24, and 36 months. Biobank  
32 samples will be collected at 3, 12, and 36 months and at time of recurrence, if applicable). At each  
33 time point, a reminder will be sent within 3 weeks to any participant who does not return the  
34 questionnaire. For the intervention group, data will also be abstracted from the app and the activity  
35 tracker.

### 36 **Discontinuation**

37 Participants will be withdrawn from the study if a recurrence occur.

### 38 **Primary outcome**

#### 39 *Patient empowerment*

40 The Health Education Impact Questionnaire (heiQ), a well-validated, widely used measurement  
41 system for comprehensively assessing the effects of health education programs on self-  
42 management[20, 45]. It consists of 40 questions grouped into eight domains. Responses are given on  
43 four-point Likert scales ranging from "strongly agree" to "strongly disagree". The heiQ has been  
44 translated into several languages and has been validated in a Norwegian population[46].  
45  
46  
47  
48  
49  
50  
51  
52  
53  
54  
55  
56  
57  
58  
59  
60

## Secondary outcomes

### *Health-related QoL*

Health-related QoL will be measured using the European Organization for Research and Treatment of Cancer Quality of Life Questionnaire Core 30 (EORTC QLQ-C30)[47] and the EuroQoL 5 Dimensions Questionnaire (EQ-5D)[48]. Regarding the EORTC QLQ-C30, the scores of the five functional scales and one global QoL scale are converted to a 0–100 scale [47]. A higher score reflects a better level of functioning and better QoL. Tumor-specific complaints are measured using the disease-specific supplements EORTC QLQ-EN24[49] for endometrial cancer, EORTC QLQ-OV28[50] for ovarian cancer, EORTC QLQ-CX24[51] for cervical cancer, and EORTC VU-34 (under development, phase 4) for vulvar cancer. The EORTC instruments (except EORTC VU-34) have been used in studies of gynecological cancer survivors, some of which were conducted in Norway[14, 15, 52]. The EQ-5D consists of two components: A descriptive system, which defines health-related QoL in terms of five dimensions (mobility, self-care, usual activities, pain/discomfort, and anxiety/depression), and a visual analog scale[48].

### *Physical activity*

Self-reported physical activity will be assessed using the short form of the International Physical Activity Questionnaire (IPAQ-sf)[53]. Exercise stage/readiness to change will be assessed using one item: “Please indicate which alternative corresponds with your current physical activity level or your interest in physical activity.” Responses are given on a five-point ordinal scale from the exercise stages of change assessment instrument[54], which is based on the trans-theoretical (stages of change) model[55]. The scale represents five different stages of change, ranging from 1 = “Not physically active and I do not intend to become more physically active during the next 6 months” (pre-contemplation stage) to 5 = “Physically active and I have been so for more than 6 months” (maintenance stage). Step count data imported from the Garmin activity tracker into the LETSGO app will be compared with self-reports of physical activity.

### *Fear of cancer recurrence*

The Health Worries subscale of the Impact of Cancer (IOC) scale will be used to assess fear of cancer recurrence[56]. The module consists of six questions, including questions on worry about the future, worry about health due to cancer, and worry about recurrence. Items are scored on a five-point intensity scale ranging from 1 (strongly disagree) to 5 (strongly agree). Higher scores reflect greater fear of cancer. The IOC has been validated in oncology patients in oncology settings[56].

### *Health care utilization*

Health care utilization will be assessed by asking patients about the frequency of their contact with their gynecologist and primary care physician and about how many health care visits were related to cancer. We will also assess how often the patients use additional care services (e.g., psychologist, rehabilitation course, physical therapist).

### *Health economic evaluation*

The EQ-5D is the generic measure preferred by the UK National Institute of Health and Care Excellence for cost-effectiveness and comparative purposes, which in turn has affected guidelines in several other countries, including Norway[48]. Quality-adjusted life years (QALYs) will be calculated based on the area-under-the curve principle, taking into account both health-related QoL and



1  
2  
3 survival of the patients during the 3-year follow-up period. Health care utilization at participating  
4 hospitals during the trial will be gathered for both groups. Health care utilization in other parts of the  
5 health care sector will be gathered from the following registry data sources: the Norwegian  
6 Prescription Database ([www.reseptregisteret.no](http://www.reseptregisteret.no)), which contains data on all medical prescriptions  
7 redeemed from Norwegian pharmacies; the Norwegian Patient Registry, which includes data on  
8 diagnostic information (ICD-10), medical treatment, length of hospital stay, and discharge data; the  
9 Municipal Patient and User Register (KPR); the individual-based care and care statistics registry  
10 (<https://helsedirektoratet.no/iplos-registeret>) for variables related to use of specialist and primary  
11 health care services; the Control and Payment of Health Reimbursement Database (<https://helfo.no/>)  
12 regarding GP visits, physiotherapy and health transportation; and the social security event database  
13 (FD-trygd). The costs of the intervention will be considered along with differences in resource use  
14 during follow-up and differences in QALYs to assess the incremental cost-effectiveness of the  
15 intervention compared to the control.  
16  
17  
18  
19

### 20 21 *Biobanking*

22 Blood samples will be collected at defined time points, as described in Table 1. Standard operating  
23 procedures (SOP) have been established for blood and sera collections. The blood samples will be  
24 processed in components and stored at  $-80^{\circ}\text{C}$ . Three 6 ml EDTA samples will be collected and  
25 immediately centrifuged. From these, buffy coat (for isolation of genomic DNA) and plasma (for  
26 purification of circulating tumor DNA) will be isolated and stored in cryo tubes. Three SST II 5 ml  
27 serum Vacutainers will be collected and centrifuged after 30 min of coagulation time. Serum (for  
28 cytokine and metabolite analysis) will then be transferred to cryo tubes for storage. The consented  
29 SOP has been introduced at the participating hospitals, with an alternative protocol for the smaller  
30 hospitals without microcentrifuges.  
31  
32  
33  
34

### 35 *Other measurements*

36 Comorbidity will be assessed using the Self-Administered Comorbidity Questionnaire (SCQ) (59),  
37 which consists of 16 common and three optional medical conditions. Patients will be asked to  
38 indicate whether they have the condition, if they are receiving treatment for it, and if it limits their  
39 activities. For the present study, we will only ask whether the patients have any of the common  
40 conditions. The SCQ has well-established validity and reliability in Norwegian patients with chronic  
41 medical conditions[57, 58]. Demographic information such as age, education, marital status, and  
42 treatment will be obtained from baseline questionnaires and medical records.  
43  
44  
45  
46

### 47 **Sample size calculation**

48 Sample size calculations were based on the primary outcome of interest. From a review of the  
49 available literature[46, 59], we anticipated that the change in mean value of the heiQ domain (self-  
50 monitoring and insight) from baseline to 12 months would be higher in the intervention group[60]. A  
51 10% difference is considered clinically relevant[61]. Assuming a common standard deviation of 1.4  
52 and using the customary significance level alpha of 5% and power of 80%, we determined that 343  
53 individuals in each group would be needed to reveal a clinically relevant difference of 10% or more.  
54 Accounting for a dropout rate of 10%, we determined that 377 would be needed in each group.  
55  
56  
57

### 58 **Statistical analyses**

1  
2  
3 Data will be analyzed after 1 and 3 years of follow-up. Data will be presented as counts and  
4 percentages (categorical variables) and mean and standard deviation or median and range for  
5 continuous data following normal or skewed distribution, respectively. Pairs of categorical variables  
6 will be compared using a chi-square test or, for small numbers, Fisher's exact test. Univariate analysis  
7 for comparison of continuous variables will be performed using a t-test for normally distributed data  
8 or the Mann-Whitney Wilcoxon test for variables with skewed distribution. Changes in the main  
9 outcome will be analyzed using generalized linear mixed models (GLMM) for repeated measures, as  
10 the outcomes are all continuous. As all included individuals will be assessed at several time points  
11 (baseline, 3, 6, 12, 24, and 36 months), statistical dependencies will exist. We will adjust for these  
12 using an unstructured covariance matrix if the model converges; if the model does not converge, we  
13 will fit a more specified covariance matrix. Type of hospital (intervention or reference), time  
14 (measurement point), and possible confounders identified when comparing patients at the  
15 intervention and control hospitals will be included as fixed factors. To account for added variation  
16 caused by enrolling participants at 10 different hospitals, we will include each hospital as a random  
17 factor. As GLMM models use all available observations, no imputation of missing data will be  
18 necessary. The results will be expressed as estimated means with 95% confidence intervals for each  
19 time point and type of hospital (intervention vs. control). Differences in means between the  
20 intervention and control groups for each assessment point will be estimated. Time to recurrence will  
21 be modeled using survival analysis methodologies. Specifically, we will use Kaplan-Meier curves to  
22 depict crude time to recurrence and a Cox model to estimate hazard ratios for recurrence. The  
23 economic analyses will include controlling for enrollment differences and sensitivity analyses,  
24 according to international guidelines[61].  
25  
26  
27  
28  
29  
30  
31

### 32 **Committees for the research**

33 A Scientific management group (consisting of the authors of the present protocol paper) has  
34 developed this protocol. A steering committee has been appointed to ensure that the trial is  
35 conducted in accordance with standard ethical principles. The committee provides an overall  
36 supervision of the study regarding the participants' safety, as well the delivery of the project outputs  
37 and the achievement of project outcomes.  
38  
39  
40

### 41 **Data management**

42 The database for clinical data and questionnaire data will be created using the Infodoc software.  
43 Data from the app will be stored at Services for sensitive data (University of Oslo). Access to  
44 databases will be secured and limited to the professionals involved in the study (personal ID and  
45 password required). The investigators in the scientific committee will be given access to the cleaned  
46 data set. Data monitoring will be provided by the trial steering committee. The research team will  
47 make regular reports to the trial steering committee. Interim analyses and stopping guidelines are  
48 not indicated because the intervention is not expected to have a significant risk of potential harm for  
49 the patients. The project management group will have close cooperation with project investigators at  
50 the participating hospitals. Research nurses at each hospital are responsible for the day-to-day data  
51 collection. Collection of data will be supervised by the project management group in close  
52 collaboration with the scientific management group.  
53  
54  
55  
56  
57

### 58 **Patient and public involvement**

1  
2  
3 We appointed a user panel of three women who had been treated for gynecological cancer and had  
4 no former experience with mHealth. The users have participated in several meetings since the initial  
5 planning of the study, and the resulting follow-up model has been adjusted based on their feedback  
6 and opinions. The users have read and commented on the protocol and have been involved in the  
7 development of the app. They have given their opinions on both the content of the app and the  
8 nurse-led consultations.  
9  
10

### 11 12 **Ethics and dissemination**

13 The LETSGO study has been approved by the Regional Committee for Medical and Health Research  
14 Ethics of South East Norway (2019/11093). The protocol is registered at [www.clinicaltrials.gov](http://www.clinicaltrials.gov)  
15 (NCT04122235). The institutional review board and the data protection officer at each of the study  
16 sites have also approved the study. All patients will receive oral and written information about the  
17 study, and written informed consent will be collected prior to enrollment. An electronic case report  
18 form is used, and participants receive a unique subject number and subject identifier. Data are  
19 entered under this identification number onto a central database stored on secured servers. The  
20 servers are protected by firewalls and are patched and maintained according to best practice. The  
21 study investigators retain the right to access data. It is estimated that the study will be completed in  
22 2024, after which the data analysis and the results will be disseminated.  
23  
24  
25  
26  
27

### 28 **Trial status**

29 The trial started inclusion in November 2019. On 27 May 2021, 378 patients have been included.

30 **Authors' contributions:** IV, SB and ID conceived the study in collaboration with the other authors. IV  
31 was responsible for writing the protocol. M Skorstad, M Småstuen, KL, TW and LPF provided critical  
32 feedback during the conception of the study and the writing up of the protocol.  
33  
34

35 **Funding statement:** The study is funded by the Norwegian Cancer Society (198057), the UNI  
36 Foundation (6845) and the South-Eastern Norway Regional Health Authorities (2019073).  
37  
38

39 **Competing interest statement:** None declared.

### 40 **Figure Legend:**

41  
42 Figure 1. The LETSGO-app (©Anette Gjoerv)  
43  
44

### 45 **References**

- 46  
47  
48 1. Ferlay J, Colombet M, Soerjomataram I, Mathers C, Parkin DM, Piñeros M, et al. Estimating  
49 the global cancer incidence and mortality in 2018: GLOBOCAN sources and methods. *International*  
50 *journal of cancer*. 2019;144(8):1941-53.  
51
- 52 2. Jacobs LA, Shulman LN. Follow-up care of cancer survivors: challenges and solutions. *Lancet*  
53 *Oncol*. 2017;18(1):e19-e29.  
54
- 55 3. Leeson SC, Beaver K, Ezendam NPM, Macuks R, Martin-Hirsch PL, Miles T, et al. The future for  
56 follow-up of gynaecological cancer in Europe. Summary of available data and overview of ongoing  
57 trials. *Eur J Obstet Gynecol Reprod Biol*. 2017;210:376-80.  
58
- 59 4. Coleman K, Austin BT, Brach C, Wagner EH. Evidence on the Chronic Care Model in the new  
60 millennium. *Health affairs (Project Hope)*. 2009;28(1):75-85.

- 1
  - 2
  - 3
  - 4
  - 5
  - 6
  - 7
  - 8
  - 9
  - 10
  - 11
  - 12
  - 13
  - 14
  - 15
  - 16
  - 17
  - 18
  - 19
  - 20
  - 21
  - 22
  - 23
  - 24
  - 25
  - 26
  - 27
  - 28
  - 29
  - 30
  - 31
  - 32
  - 33
  - 34
  - 35
  - 36
  - 37
  - 38
  - 39
  - 40
  - 41
  - 42
  - 43
  - 44
  - 45
  - 46
  - 47
  - 48
  - 49
  - 50
  - 51
  - 52
  - 53
  - 54
  - 55
  - 56
  - 57
  - 58
  - 59
  - 60
5. Alfano CM, Mayer DK, Bhatia S, Maher J, Scott JM, Nekhlyudov L, et al. Implementing personalized pathways for cancer follow-up care in the United States: Proceedings from an American Cancer Society-American Society of Clinical Oncology summit. *CA Cancer J Clin.* 2019;69(3):234-47.
6. Beaver K, Williamson S, Sutton C, Hollingworth W, Gardner A, Allton B, et al. Comparing hospital and telephone follow-up for patients treated for stage-I endometrial cancer (ENDCAT trial): a randomised, multicentre, non-inferiority trial. *BJOG : an international journal of obstetrics and gynaecology.* 2017;124(1):150-60.
7. Jeppesen MM, Jensen PT, Hansen DG, Christensen RD, Mogensen O. Patient-initiated follow up affects fear of recurrence and healthcare use: a randomised trial in early-stage endometrial cancer. *BJOG : an international journal of obstetrics and gynaecology.* 2018.
8. Lanceley A, Berzuini C, Burnell M, Gessler S, Morris S, Ryan A, et al. Ovarian Cancer Follow-up: A Preliminary Comparison of 2 Approaches. *International journal of gynecological cancer : official journal of the International Gynecological Cancer Society.* 2017;27(1):59-68.
9. McCabe MS, Partridge AH, Grunfeld E, Hudson MM. Risk-based health care, the cancer survivor, the oncologist, and the primary care physician. *Seminars in oncology.* 2013;40(6):804-12.
10. Vistad I, Cvancarova M, Fossa SD, Kristensen GB. Postradiotherapy morbidity in long-term survivors after locally advanced cervical cancer: how well do physicians' assessments agree with those of their patients? *IntJRadiatOncolBiolPhys.* 2008;71(5):1335-42.
11. Vistad I, Cvancarova M, Kristensen GB, Fossa SD. A study of chronic pelvic pain after radiotherapy in survivors of locally advanced cervical cancer. *J Cancer Surviv.* 2011;5(2):208-16.
12. Vistad I, Kristensen GB, Fossa SD, Dahl AA, Morkrid L. Intestinal malabsorption in long-term survivors of cervical cancer treated with radiotherapy. *IntJRadiatOncolBiolPhys.* 2009;73(4):1141-7.
13. Vistad I, Fossa S, Kristensen G, Dahl A. Chronic fatigue and its correlates in long-term survivors of cervical cancer treated with radiotherapy. *BJOG.* 2007.
14. Steen R, Dahl AA, Hess SL, Kiserud CE. A study of chronic fatigue in Norwegian cervical cancer survivors. *Gynecologic oncology.* 2017;146(3):630-5.
15. Liavaag AH, Dorum A, Fossa SD, Trope C, Dahl AA. Controlled study of fatigue, quality of life, and somatic and mental morbidity in epithelial ovarian cancer survivors: how lucky are the lucky ones? *JClinOncol.* 2007;25(15):2049-56.
16. Cianci S, Rosati A, Capozzi VA, Tarascio M, Uccella S, Palumbo M, et al. Quality of life and sexual functioning of patient affected by endometrial cancer. *Minerva Med.* 2021;112(1):81-95.
17. Cianci S, Tarascio M, Rosati A, Caruso S, Uccella S, Cosentino F, et al. Sexual function and quality of life of patients affected by ovarian cancer. *Minerva Med.* 2019;110(4):320-9.
18. Vistad I, Bjorge L, Solheim O, Fiane B, Sachse K, Tjugum J, et al. A national, prospective observational study of first recurrence after primary treatment for gynecological cancer in Norway. *Acta obstetrica et gynecologica Scandinavica.* 2017.
19. Rosenberg CA, Flanagan C, Brockstein B, Obel JC, Dragon LH, Merkel DE, et al. Promotion of self-management for post treatment cancer survivors: evaluation of a risk-adapted visit. *Journal of cancer survivorship : research and practice.* 2016;10(1):206-19.
20. Maunsell E, Lauzier S, Brunet J, Pelletier S, Osborne RH, Campbell HS. Health-related empowerment in cancer: validity of scales from the Health Education Impact Questionnaire. *Cancer.* 2014;120(20):3228-36.

- 1  
2  
3 21. Davy C, Bleasel J, Liu H, Tchan M, Ponniah S, Brown A. Effectiveness of chronic care models:  
4 opportunities for improving healthcare practice and health outcomes: a systematic review. *BMC*  
5 *Health Serv Res.* 2015;15:194.  
6
- 7 22. Thomaier L, Jewett P, Brown K, Gotlieb R, Teoh D, Blaes AH, et al. The associations between  
8 physical activity, neuropathy symptoms and health-related quality of life among gynecologic cancer  
9 survivors. *Gynecologic oncology.* 2020;158(2):361-5.  
10
- 11 23. Friedenreich CM, Cook LS, Wang Q, Kokts-Porietis RL, McNeil J, Ryder-Burbidge C, et al.  
12 Prospective Cohort Study of Pre- and Postdiagnosis Physical Activity and Endometrial Cancer Survival.  
13 *J Clin Oncol.* 2020:Jco2001336.  
14
- 15 24. Rock CL, Thomson C, Gansler T, Gapstur SM, McCullough ML, Patel AV, et al. American  
16 Cancer Society guideline for diet and physical activity for cancer prevention. *CA: A Cancer Journal for*  
17 *Clinicians.* 2020;70(4):245-71.  
18
- 19 25. von Gruenigen V, Waggoner S, Frasure H, Kavanagh M, Janata J, Rose P, et al. Lifestyle  
20 challenges in endometrial cancer survivorship. *Obstet Gynecol.* 2011;117(1):93-100.  
21
- 22 26. Samdal GB, Eide GE, Barth T, Williams G, Meland E. Effective behaviour change techniques  
23 for physical activity and healthy eating in overweight and obese adults; systematic review and meta-  
24 regression analyses. *The International Journal of Behavioral Nutrition and Physical Activity.*  
25 2017;14:42.  
26
- 27 27. Schinköthe T. Individualized eHealth Support for Oncological Therapy Management. *Breast*  
28 *care (Basel, Switzerland).* 2019;14(3):130-4.  
29
- 30 28. Purswani JM, Dicker AP, Champ CE, Cantor M, Ohri N. Big Data From Small Devices: The  
31 Future of Smartphones in Oncology. *Seminars in radiation oncology.* 2019;29(4):338-47.  
32
- 33 29. Furness K, Sarkies MN, Huggins CE, Croagh D, Haines TP. Impact of the Method of Delivering  
34 Electronic Health Behavior Change Interventions in Survivors of Cancer on Engagement, Health  
35 Behaviors, and Health Outcomes: Systematic Review and Meta-Analysis. *Journal of medical Internet*  
36 *research.* 2020;22(6):e16112.  
37
- 38 30. Triberti S, Savioni L, Sebri V, Pravettoni G. eHealth for improving quality of life in breast  
39 cancer patients: A systematic review. *Cancer treatment reviews.* 2019;74:1-14.  
40
- 41 31. Denis F, Lethrosne C, Pourel N, Molinier O, Pointreau Y, Domont J, et al. Randomized Trial  
42 Comparing a Web-Mediated Follow-up With Routine Surveillance in Lung Cancer Patients. *J Natl*  
43 *Cancer Inst.* 2017;109(9).  
44
- 45 32. Lyu KX, Zhao J, Wang B, Xiong GX, Yang WQ, Liu QH, et al. Smartphone Application WeChat  
46 for Clinical Follow-up of Discharged Patients with Head and Neck Tumors: A Randomized Controlled  
47 Trial. *Chin Med J (Engl).* 2016;129(23):2816-23.  
48
- 49 33. Ormel HL, van der Schoot GGF, Westerink NL, Sluiter WJ, Gietema JA, Walenkamp AME. Self-  
50 monitoring physical activity with a smartphone application in cancer patients: a randomized  
51 feasibility study (SMART-trial). *Supportive care in cancer : official journal of the Multinational*  
52 *Association of Supportive Care in Cancer.* 2018;26(11):3915-23.  
53
- 54 34. Schrepf A, Clevenger L, Christensen D, DeGeest K, Bender D, Ahmed A, et al. Cortisol and  
55 inflammatory processes in ovarian cancer patients following primary treatment: relationships with  
56 depression, fatigue, and disability. *Brain, behavior, and immunity.* 2013;30 Suppl(0):S126-34.  
57
- 58 35. Duffy SA, Taylor JM, Terrell JE, Islam M, Li Y, Fowler KE, et al. Interleukin-6 predicts  
59 recurrence and survival among head and neck cancer patients. *Cancer.* 2008;113(4):750-7.  
60
36. Trompet S, de Craen AJ, Mooijaart S, Stott DJ, Ford I, Sattar N, et al. High Innate Production  
Capacity of Proinflammatory Cytokines Increases Risk for Death from Cancer: Results of the PROSPER

- 1  
2  
3 Study. *Clinical cancer research : an official journal of the American Association for Cancer Research*.  
4 2009;15(24):7744-8.  
5
- 6 37. Kitson SJ, Lindsay J, Sivalingam VN, Lunt M, Ryan NAJ, Edmondson RJ, et al. The unrecognized  
7 burden of cardiovascular risk factors in women newly diagnosed with endometrial cancer: A  
8 prospective case control study. *Gynecologic oncology*. 2018;148(1):154-60.  
9
- 10 38. Chan AW, Tetzlaff JM, Altman DG, Laupacis A, Gøtzsche PC, Krleža-Jerić K, et al. SPIRIT 2013  
11 statement: defining standard protocol items for clinical trials. *Ann Intern Med*. 2013;158(3):200-7.  
12
- 13 39. Bourke L, Homer KE, Thaha MA, Steed L, Rosario DJ, Robb KA, et al. Interventions for  
14 promoting habitual exercise in people living with and beyond cancer. *The Cochrane database of*  
15 *systematic reviews*. 2013(9):Cd010192.  
16
- 17 40. Turner RR, Steed L, Quirk H, Greasley RU, Saxton JM, Taylor SJ, et al. Interventions for  
18 promoting habitual exercise in people living with and beyond cancer. *The Cochrane database of*  
19 *systematic reviews*. 2018;9:Cd010192.  
20
- 21 41. Finne E, Glausch M, Exner AK, Sauzet O, Stolzel F, Seidel N. Behavior change techniques for  
22 increasing physical activity in cancer survivors: a systematic review and meta-analysis of randomized  
23 controlled trials. *Cancer management and research*. 2018;10:5125-43.  
24
- 25 42. Vistad I, Moy BW, Salvesen HB, Liavaag AH. Follow-up routines in gynecological cancer - time  
26 for a change? *Acta ObstetGynecolScand*. 2011.  
27
- 28 43. Miller WR, Rollnick S. Meeting in the middle: motivational interviewing and self-  
29 determination theory. *Int J Behav Nutr Phys Act*. 2012;9:25.  
30
- 31 44. Kulis D, Bottomley A, Whittaker C, van de Poll-Franse LV, Darlington A, Holzner B, et al.  
32 PRM250 - The Use of The Eortc Item Library To Supplement Eortc Quality of Life Instruments. *Value*  
33 *in Health*. 2017;20(9):A775.  
34
- 35 45. Osborne RH, Elsworth GR, Whitfield K. The Health Education Impact Questionnaire (heiQ): an  
36 outcomes and evaluation measure for patient education and self-management interventions for  
37 people with chronic conditions. *Patient education and counseling*. 2007;66(2):192-201.  
38
- 39 46. Wahl AK, Osborne RH, Langeland E, Wentzel-Larsen T, Mengshoel AM, Ribu L, et al. Making  
40 robust decisions about the impact of health education programs: Psychometric evaluation of the  
41 Health Education Impact Questionnaire (heiQ) in diverse patient groups in Norway. *Patient education*  
42 *and counseling*. 2016;99(10):1733-8.  
43
- 44 47. Aaronson N, Ahmedzai S, Bergman B, Bullinger M, Cull A, Duez N, et al. The European  
45 Organization for Research and Treatment of Cancer QLQ-C30: a quality-of-life instrument for use in  
46 international clinical trials in oncology. *J Natl Cancer Inst*. 1993;85(5):365-76.  
47
- 48 48. Nord E. EuroQol: health-related quality of life measurement. Valuations of health states by  
49 the general public in Norway. *Health policy (Amsterdam, Netherlands)*. 1991;18(1):25-36.  
50
- 51 49. Stukan M, Zalewski K, Mardas M, Filarska D, Szajewski M, Kmieć A, et al. Independent  
52 psychometric validation of European Organization for Research and Treatment of Cancer Quality of  
53 Life Questionnaire-Endometrial Cancer Module (EORTC QLQ-EN24). *Eur J Cancer Care (Engl)*.  
54 2017;Epub ahead of print.  
55
- 56 50. Greimel E, Bottomley A, Cull A, Waldenstrom A, Arraras J, Chauvenet L, et al. An international  
57 field study of the reliability and validity of a disease-specific questionnaire module (the QLQ-OV28) in  
58 assessing the quality of life of patients with ovarian cancer. . *Eur J Cancer*. 2003;39(10):1402-8.  
59
- 60 51. Greimel E, Kuljanic Vlasic K, Waldenstrom A, Duric V, Jensen P, Singer S, et al. The European  
Organization for Research and Treatment of Cancer (EORTC) Quality-of-Life questionnaire cervical  
cancer module: EORTC QLQ-CX24. . *Cancer*. 2006;107(8):1812-22.

- 1  
2  
3 52. Knobel H, Loge JH, Brenne E, Fayers P, Hjermstad MJ, Kaasa S. The validity of EORTC QLQ-C30  
4 fatigue scale in advanced cancer patients and cancer survivors. *PalliatMed*. 2003;17(8):664-72.  
5  
6 53. Ekelund U, Sepp H, Brage S, Becker W, Jakes R, Hennings M, et al. Criterion-related validity of  
7 the last 7-day, short form of the International Physical Activity Questionnaire in Swedish adults.  
8 *Public Health Nutr*. 2006;9(2):258-65.  
9  
10 54. Nigg C, Riebe D. The transtheoretical model: research review of exercise behavior in older  
11 adults. In: Burbank P, Riebe D, editors. *Promoting exercise and behavior change in older adults:  
12 interventions with the transtheoretical model* New York: Springer; 2002. p. 147-80.  
13  
14 55. Prochaska JO, DiClemente C, Norcross JC. In search of how people change. *American  
15 Psychologist*. 1992;47:1002-14.  
16  
17 56. Zebrack BJ, Ganz PA, Bernaards CA, Petersen L, Abraham L. Assessing the impact of cancer:  
18 development of a new instrument for long-term survivors. *Psycho-oncology*. 2006;15(5):407-21.  
19  
20 57. Hofso K, Miaskowski C, Bjordal K, Cooper BA, Rustoen T. Previous chemotherapy influences  
21 the symptom experience and quality of life of women with breast cancer prior to radiation therapy.  
22 *Cancer nursing*. 2012;35(3):167-77.  
23  
24 58. Oksholm T, Rustoen T, Cooper B, Paul SM, Solberg S, Henriksen K, et al. Trajectories of  
25 Symptom Occurrence and Severity From Before Through Five Months After Lung Cancer Surgery.  
26 *Journal of pain and symptom management*. 2015;49(6):995-1015.  
27  
28 59. Holmen H, Torbjørnsen A, Wahl AK, Jenum AK, Småstuen MC, Årsand E, et al. A Mobile  
29 Health Intervention for Self-Management and Lifestyle Change for Persons With Type 2 Diabetes,  
30 Part 2: One-Year Results From the Norwegian Randomized Controlled Trial RENEWING HEALTH. *JMIR  
31 mHealth and uHealth*. 2014;2(4):e57.  
32  
33 60. Elsworth GR, Osborne RH. Percentile ranks and benchmark estimates of change for the  
34 Health Education Impact Questionnaire: Normative data from an Australian sample. *SAGE open  
35 medicine*. 2017;5:2050312117695716.  
36  
37 61. Ramsey SD, Willke RJ, Glick H, Reed SD, Augustovski F, Jonsson B, et al. Cost-effectiveness  
38 analysis alongside clinical trials II-An ISPOR Good Research Practices Task Force report. *Value in  
39 health : the journal of the International Society for Pharmacoeconomics and Outcomes Research*.  
40 2015;18(2):161-72.  
41  
42  
43  
44  
45  
46  
47  
48  
49  
50  
51  
52  
53  
54  
55  
56  
57  
58  
59  
60

**Table 1.** Overview of all outcome measures and assessment times of the LETSGO study

| Outcomes                           | Measurement instrument                                           | Intervention hospitals |                 |    |                 |    |    |     |     |     |            |            |                | Control hospitals |    |    |     |     |     |            |            |   |
|------------------------------------|------------------------------------------------------------------|------------------------|-----------------|----|-----------------|----|----|-----|-----|-----|------------|------------|----------------|-------------------|----|----|-----|-----|-----|------------|------------|---|
|                                    |                                                                  | B <sup>1</sup>         | 3w <sup>2</sup> | 6w | 3m <sup>3</sup> | 6m | 9m | 12m | 15m | 18m | 21/<br>30m | 24/<br>36m | B <sup>4</sup> | 3m                | 6m | 9m | 12m | 15m | 18m | 21/<br>30m | 24/<br>36m |   |
| <b>Questionnaires</b>              |                                                                  |                        |                 |    |                 |    |    |     |     |     |            |            |                |                   |    |    |     |     |     |            |            |   |
| <i>Psychosocial outcomes</i>       |                                                                  |                        |                 |    |                 |    |    |     |     |     |            |            |                |                   |    |    |     |     |     |            |            |   |
| Patient empowerment                | heiQ <sup>6</sup>                                                | X                      |                 |    | X               | X  |    |     |     | X   |            |            |                | X                 | X  | X  | X   |     |     | X          |            | X |
| Generic QOL <sup>5</sup>           | EQ-5D <sup>7</sup>                                               | X                      |                 |    | X               | X  |    |     |     | X   |            |            |                | X                 | X  | X  | X   |     |     | X          |            | X |
| Disease specific QOL               | EORTC QLQ-C30 <sup>8</sup>                                       | X                      |                 |    | X               | X  |    |     |     | X   |            |            |                | X                 | X  | X  | X   |     |     | X          |            | X |
| Tumor specific QOL                 | EORTC QLQ modules <sup>9</sup> CX24, EN24, OV28 and VU34         | X                      |                 |    | X               | X  |    |     |     | X   |            |            |                | X                 | X  | X  | X   |     |     | X          |            | X |
| Cancer worry                       | IOC <sup>10</sup> worry subscale                                 | X                      |                 |    | X               | X  |    |     |     | X   |            |            |                | X                 | X  | X  | X   |     |     | X          |            | X |
| Sexuality                          | SQOL-f <sup>11</sup> selected items                              | X                      |                 |    | X               | X  |    |     |     | X   |            |            |                | X                 | X  | X  | X   |     |     | X          |            | X |
| Follow-up care                     | Study-specific questions                                         | X                      |                 |    | X               | X  |    |     |     | X   |            |            |                | X                 | X  | X  | X   |     |     | X          |            | X |
| <i>Personal factors</i>            |                                                                  |                        |                 |    |                 |    |    |     |     |     |            |            |                |                   |    |    |     |     |     |            |            |   |
| Demographic variables              | Standard questions                                               | X                      |                 |    | X               | X  |    |     |     | X   |            |            |                | X                 | X  | X  | X   |     |     | X          |            | X |
| Comorbidity                        | SCQ <sup>12</sup>                                                | X                      |                 |    | X               | X  |    |     |     | X   |            |            |                | X                 | X  | X  | X   |     |     | X          |            | X |
| <i>Lifestyle factors</i>           |                                                                  |                        |                 |    |                 |    |    |     |     |     |            |            |                |                   |    |    |     |     |     |            |            |   |
| Physical activity                  | IPAQ-SF <sup>13</sup> , ESAI <sup>14</sup><br>Standard questions | X                      |                 |    | X               | X  |    |     |     | X   |            |            |                | X                 | X  | X  | X   |     |     | X          |            | X |
| Alcohol use                        | Standard questions                                               | X                      |                 |    | X               | X  |    |     |     | X   |            |            |                | X                 | X  | X  | X   |     |     | X          |            | X |
| Smoking                            | Standard questions                                               | X                      |                 |    | X               | X  |    |     |     | X   |            |            |                | X                 | X  | X  | X   |     |     | X          |            | X |
| <i>Clinical factors</i>            |                                                                  |                        |                 |    |                 |    |    |     |     |     |            |            |                |                   |    |    |     |     |     |            |            |   |
| Medical history                    | eCRF <sup>15</sup><br>eCRF                                       | X                      |                 |    |                 |    |    |     |     |     |            |            |                |                   | X  |    |     |     |     |            |            |   |
| Medication                         | Blood pressure, pulse,<br>weight                                 | X                      |                 |    |                 |    |    |     |     |     |            |            |                |                   | X  |    |     |     |     |            |            |   |
| Vital signs                        |                                                                  | X                      |                 | X  |                 | X  |    |     |     | X   |            | X          |                | X                 |    |    |     |     |     |            |            |   |
| Performance status                 | ECOG <sup>16</sup> status                                        | X                      |                 | X  |                 | X  |    |     |     | X   |            | X          |                | X                 |    |    |     |     |     |            |            |   |
| Gynecological examination          | NA <sup>17</sup>                                                 |                        |                 |    | X               |    |    | X   |     | X   |            | X          |                |                   | X  | X  | X   | X   | X   | X          | X          | X |
| <b>LETSGO intervention (nurse)</b> |                                                                  |                        |                 |    |                 |    |    |     |     |     |            |            |                |                   |    |    |     |     |     |            |            |   |
| Introduction to LETSGO-app         | NA                                                               |                        |                 | X  |                 | X  |    |     |     | X   |            | X          |                | X                 |    |    |     |     |     |            |            |   |
| Assessment of rehabilitation needs | NA                                                               |                        |                 | X  |                 | X  |    |     |     | X   |            | X          |                | X                 |    |    |     |     |     |            |            |   |



1  
2  
3  
4  
5  
6  
7  
8  
9  
10  
11  
12  
13  
14  
15  
16  
17  
18  
19  
20  
21  
22  
23  
24  
25  
26  
27  
28  
29  
30  
31  
32  
33  
34  
35  
36  
37  
38  
39  
40  
41  
42  
43  
44  
45  
46

|                                              |                      |   |   |   |   |   |   |   |   |   |                 |   |   |   |   |   |   |   |   |                 |
|----------------------------------------------|----------------------|---|---|---|---|---|---|---|---|---|-----------------|---|---|---|---|---|---|---|---|-----------------|
| <b>Set goals for physical activity</b>       | NA                   |   |   | X |   |   |   |   |   |   |                 |   |   |   |   |   |   |   |   |                 |
| <b>Follow up goals for physical activity</b> | NA                   |   |   |   |   | X |   | X |   | X |                 |   |   |   |   |   |   |   |   |                 |
| <b>Motivating interview</b>                  | NA                   | X |   | X |   | X |   | X |   | X |                 |   |   |   |   |   |   |   |   |                 |
| <b>Assessment of late-effects</b>            | Study-specific chart |   |   |   |   | X |   | X |   | X |                 |   |   |   |   |   |   |   |   |                 |
| <b>Visits at out-patient clinic</b>          | NA                   |   |   |   |   |   |   |   |   |   |                 |   |   |   |   |   |   |   |   |                 |
| <b>Low risk group intervention</b>           |                      | X | X |   | X |   | X |   |   |   |                 |   |   |   |   |   |   |   |   |                 |
| <b>Medium/high risk group intervention</b>   |                      | X | X |   | X |   | X |   | X |   | X               |   |   |   |   |   |   |   |   |                 |
| <b>Control group (all)</b>                   |                      |   |   |   |   |   |   |   |   |   |                 |   | X | X | X | X | X | X | X | X               |
| <b>Biological factors</b>                    |                      |   |   |   |   |   |   |   |   |   |                 |   |   |   |   |   |   |   |   |                 |
| <b>General laboratory</b>                    | Blood                | X |   |   | X | X |   | X |   |   | X               | X | X | X |   | X |   |   |   | X               |
| <b>Biomarkers</b>                            | Blood                |   |   |   | X |   |   | X |   |   | X <sup>18</sup> | X | X |   | X |   |   |   |   | X <sup>18</sup> |

<sup>1</sup>Baseline; <sup>2</sup>Weeks; <sup>3</sup>Months; <sup>4</sup>At reference hospitals, first questionnaire/blood tests may be collected at 3 months; <sup>5</sup>Quality of Life; <sup>6</sup>Health Education Impact Questionnaire; <sup>7</sup>EuroQol 5 dimensions questionnaire; <sup>8</sup>The European Organization for Research and Treatment of Cancer Quality of Life Questionnaire Core 30; <sup>9</sup>Modules: cervix, endometrium, ovarian, vulvar; <sup>10</sup>The Impact of Cancer Questionnaire; <sup>11</sup>Sexual Quality of Life—Female Questionnaire; <sup>12</sup>Self-Administered Comorbidity Questionnaire; <sup>13</sup>Physical Activity Questionnaire Short-Form <sup>14</sup>Exercise Stage Assessment Instrument; <sup>15</sup>Electronic Case Report Form; <sup>16</sup>Eastern Oncology Cooperative Group; <sup>17</sup>Not applicable; <sup>18</sup>Biomarkers at 3, 12 and 36 months.

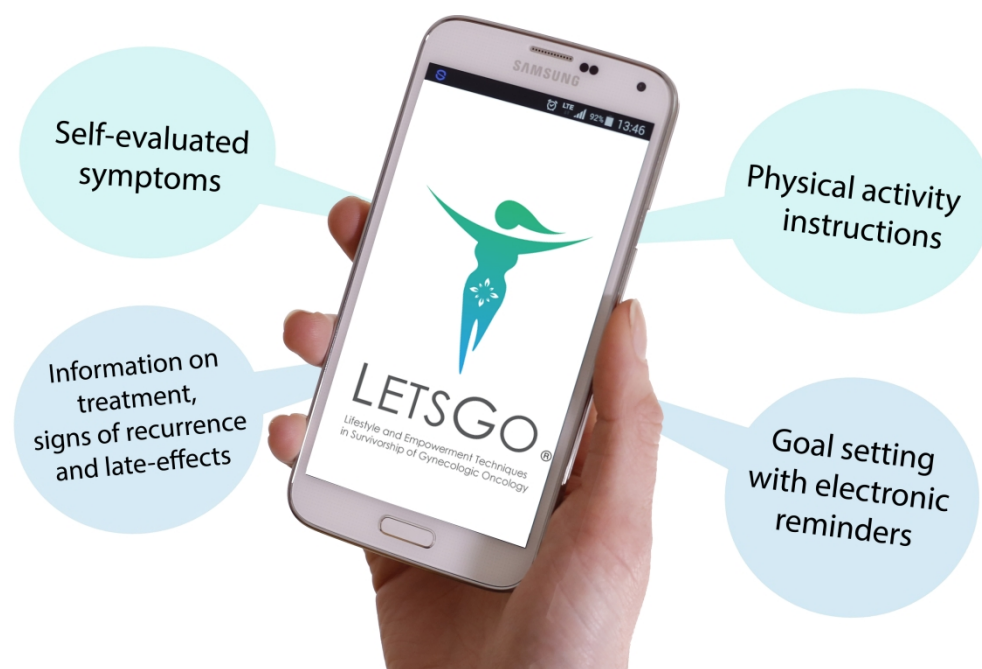

Figure 1. The LETSGO-app (□Anette Gjoerv)

1292x849mm (72 x 72 DPI)

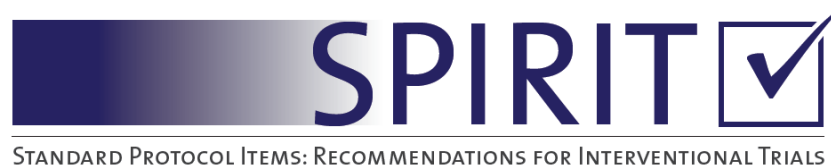

STANDARD PROTOCOL ITEMS: RECOMMENDATIONS FOR INTERVENTIONAL TRIALS

SPIRIT 2013 Checklist: Recommended items to address in a clinical trial protocol and related documents\*

| Section/item                      | Item No | Description                                                                                                                                                                                                                                                                              | Addressed on page number |
|-----------------------------------|---------|------------------------------------------------------------------------------------------------------------------------------------------------------------------------------------------------------------------------------------------------------------------------------------------|--------------------------|
| <b>Administrative information</b> |         |                                                                                                                                                                                                                                                                                          |                          |
| Title                             | 1       | Descriptive title identifying the study design, population, interventions, and, if applicable, trial acronym                                                                                                                                                                             | 1                        |
| Trial registration                | 2a      | Trial identifier and registry name. If not yet registered, name of intended registry                                                                                                                                                                                                     | 2                        |
|                                   | 2b      | All items from the World Health Organization Trial Registration Data Set                                                                                                                                                                                                                 | Supplementary            |
| Protocol version                  | 3       | Date and version identifier                                                                                                                                                                                                                                                              | Supplementary            |
| Funding                           | 4       | Sources and types of financial, material, and other support                                                                                                                                                                                                                              | 11                       |
| Roles and responsibilities        | 5a      | Names, affiliations, and roles of protocol contributors                                                                                                                                                                                                                                  | 1, 10                    |
|                                   | 5b      | Name and contact information for the trial sponsor                                                                                                                                                                                                                                       | Supplementary            |
|                                   | 5c      | Role of study sponsor and funders, if any, in study design; collection, management, analysis, and interpretation of data; writing of the report; and the decision to submit the report for publication, including whether they will have ultimate authority over any of these activities | Supplementary            |
|                                   | 5d      | Composition, roles, and responsibilities of the coordinating centre, steering committee, endpoint adjudication committee, data management team, and other individuals or groups overseeing the trial, if applicable (see Item 21a for data monitoring committee)                         | 10                       |

1 **Introduction**

2

3 Background and 6a Description of research question and justification for undertaking the trial, including summary of relevant 3, 4  
 4 rationale studies (published and unpublished) examining benefits and harms for each intervention  
 5

6 6b Explanation for choice of comparators 4, 7  
 7

8 Objectives 7 Specific objectives or hypotheses 10  
 9

10 Trial design 8 Description of trial design including type of trial (eg, parallel group, crossover, factorial, single group), 4  
 11 allocation ratio, and framework (eg, superiority, equivalence, noninferiority, exploratory)  
 12  
 13

14 **Methods: Participants, interventions, and outcomes**

15

16 Study setting 9 Description of study settings (eg, community clinic, academic hospital) and list of countries where data will 5  
 17 be collected. Reference to where list of study sites can be obtained  
 18

19 Eligibility criteria 10 Inclusion and exclusion criteria for participants. If applicable, eligibility criteria for study centres and 5  
 20 individuals who will perform the interventions (eg, surgeons, psychotherapists)  
 21

22 Interventions 11a Interventions for each group with sufficient detail to allow replication, including how and when they will be 5, 6, 7  
 23 administered  
 24

25 11b Criteria for discontinuing or modifying allocated interventions for a given trial participant (eg, drug dose 7  
 26 change in response to harms, participant request, or improving/worsening disease)  
 27

28 11c Strategies to improve adherence to intervention protocols, and any procedures for monitoring adherence 7  
 29 (eg, drug tablet return, laboratory tests)  
 30

31 11d Relevant concomitant care and interventions that are permitted or prohibited during the trial NA  
 32

33 Outcomes 12 Primary, secondary, and other outcomes, including the specific measurement variable (eg, systolic blood 7, 8, 9  
 34 pressure), analysis metric (eg, change from baseline, final value, time to event), method of aggregation (eg, 7, 8, 9  
 35 median, proportion), and time point for each outcome. Explanation of the clinical relevance of chosen  
 36 efficacy and harm outcomes is strongly recommended  
 37

38 Participant timeline 13 Time schedule of enrolment, interventions (including any run-ins and washouts), assessments, and visits for 5,7  
 39 participants. A schematic diagram is highly recommended (see Figure)  
 40  
 41  
 42

|   |             |    |                                                                                                                                                                                       |      |
|---|-------------|----|---------------------------------------------------------------------------------------------------------------------------------------------------------------------------------------|------|
| 1 | Sample size | 14 | Estimated number of participants needed to achieve study objectives and how it was determined, including clinical and statistical assumptions supporting any sample size calculations | 9    |
| 2 |             |    |                                                                                                                                                                                       |      |
| 3 |             |    |                                                                                                                                                                                       |      |
| 4 | Recruitment | 15 | Strategies for achieving adequate participant enrolment to reach target sample size                                                                                                   | 5, 6 |
| 5 |             |    |                                                                                                                                                                                       |      |

6 **Methods: Assignment of interventions (for controlled trials)**

7 Allocation:

|    |                                  |     |                                                                                                                                                                                                                                                                                                                                                          |    |
|----|----------------------------------|-----|----------------------------------------------------------------------------------------------------------------------------------------------------------------------------------------------------------------------------------------------------------------------------------------------------------------------------------------------------------|----|
| 10 | Sequence generation              | 16a | Method of generating the allocation sequence (eg, computer-generated random numbers), and list of any factors for stratification. To reduce predictability of a random sequence, details of any planned restriction (eg, blocking) should be provided in a separate document that is unavailable to those who enrol participants or assign interventions | NA |
| 11 |                                  |     |                                                                                                                                                                                                                                                                                                                                                          |    |
| 12 |                                  |     |                                                                                                                                                                                                                                                                                                                                                          |    |
| 13 |                                  |     |                                                                                                                                                                                                                                                                                                                                                          |    |
| 14 |                                  |     |                                                                                                                                                                                                                                                                                                                                                          |    |
| 15 |                                  |     |                                                                                                                                                                                                                                                                                                                                                          |    |
| 16 | Allocation concealment mechanism | 16b | Mechanism of implementing the allocation sequence (eg, central telephone; sequentially numbered, opaque, sealed envelopes), describing any steps to conceal the sequence until interventions are assigned                                                                                                                                                | NA |
| 17 |                                  |     |                                                                                                                                                                                                                                                                                                                                                          |    |
| 18 |                                  |     |                                                                                                                                                                                                                                                                                                                                                          |    |
| 19 |                                  |     |                                                                                                                                                                                                                                                                                                                                                          |    |
| 20 | Implementation                   | 16c | Who will generate the allocation sequence, who will enrol participants, and who will assign participants to interventions                                                                                                                                                                                                                                | NA |
| 21 |                                  |     |                                                                                                                                                                                                                                                                                                                                                          |    |
| 22 |                                  |     |                                                                                                                                                                                                                                                                                                                                                          |    |
| 23 |                                  |     |                                                                                                                                                                                                                                                                                                                                                          |    |
| 24 | Blinding (masking)               | 17a | Who will be blinded after assignment to interventions (eg, trial participants, care providers, outcome assessors, data analysts), and how                                                                                                                                                                                                                | NA |
| 25 |                                  |     |                                                                                                                                                                                                                                                                                                                                                          |    |
| 26 |                                  |     |                                                                                                                                                                                                                                                                                                                                                          |    |
| 27 |                                  | 17b | If blinded, circumstances under which unblinding is permissible, and procedure for revealing a participant's allocated intervention during the trial                                                                                                                                                                                                     | NA |
| 28 |                                  |     |                                                                                                                                                                                                                                                                                                                                                          |    |
| 29 |                                  |     |                                                                                                                                                                                                                                                                                                                                                          |    |
| 30 |                                  |     |                                                                                                                                                                                                                                                                                                                                                          |    |

31 **Methods: Data collection, management, and analysis**

|    |                         |     |                                                                                                                                                                                                                                                                                                                                                                                                              |            |
|----|-------------------------|-----|--------------------------------------------------------------------------------------------------------------------------------------------------------------------------------------------------------------------------------------------------------------------------------------------------------------------------------------------------------------------------------------------------------------|------------|
| 33 | Data collection methods | 18a | Plans for assessment and collection of outcome, baseline, and other trial data, including any related processes to promote data quality (eg, duplicate measurements, training of assessors) and a description of study instruments (eg, questionnaires, laboratory tests) along with their reliability and validity, if known. Reference to where data collection forms can be found, if not in the protocol | 5, 7, 8, 9 |
| 34 |                         |     |                                                                                                                                                                                                                                                                                                                                                                                                              |            |
| 35 |                         |     |                                                                                                                                                                                                                                                                                                                                                                                                              |            |
| 36 |                         |     |                                                                                                                                                                                                                                                                                                                                                                                                              |            |
| 37 |                         |     |                                                                                                                                                                                                                                                                                                                                                                                                              |            |
| 38 |                         |     |                                                                                                                                                                                                                                                                                                                                                                                                              |            |
| 39 |                         | 18b | Plans to promote participant retention and complete follow-up, including list of any outcome data to be collected for participants who discontinue or deviate from intervention protocols                                                                                                                                                                                                                    | 6, 9       |
| 40 |                         |     |                                                                                                                                                                                                                                                                                                                                                                                                              |            |
| 41 |                         |     |                                                                                                                                                                                                                                                                                                                                                                                                              |            |
| 42 |                         |     |                                                                                                                                                                                                                                                                                                                                                                                                              |            |

|    |                     |     |                                                                                                                                                                                                                                                                   |    |
|----|---------------------|-----|-------------------------------------------------------------------------------------------------------------------------------------------------------------------------------------------------------------------------------------------------------------------|----|
| 1  | Data management     | 19  | Plans for data entry, coding, security, and storage, including any related processes to promote data quality (eg, double data entry; range checks for data values). Reference to where details of data management procedures can be found, if not in the protocol | 10 |
| 2  |                     |     |                                                                                                                                                                                                                                                                   |    |
| 3  |                     |     |                                                                                                                                                                                                                                                                   |    |
| 4  |                     |     |                                                                                                                                                                                                                                                                   |    |
| 5  | Statistical methods | 20a | Statistical methods for analysing primary and secondary outcomes. Reference to where other details of the statistical analysis plan can be found, if not in the protocol                                                                                          | 10 |
| 6  |                     |     |                                                                                                                                                                                                                                                                   |    |
| 7  |                     |     |                                                                                                                                                                                                                                                                   |    |
| 8  |                     | 20b | Methods for any additional analyses (eg, subgroup and adjusted analyses)                                                                                                                                                                                          | 10 |
| 9  |                     |     |                                                                                                                                                                                                                                                                   |    |
| 10 |                     | 20c | Definition of analysis population relating to protocol non-adherence (eg, as randomised analysis), and any statistical methods to handle missing data (eg, multiple imputation)                                                                                   | 10 |
| 11 |                     |     |                                                                                                                                                                                                                                                                   |    |
| 12 |                     |     |                                                                                                                                                                                                                                                                   |    |
| 13 |                     |     |                                                                                                                                                                                                                                                                   |    |

#### 14 **Methods: Monitoring**

|    |                 |     |                                                                                                                                                                                                                                                                                                                                       |    |
|----|-----------------|-----|---------------------------------------------------------------------------------------------------------------------------------------------------------------------------------------------------------------------------------------------------------------------------------------------------------------------------------------|----|
| 15 |                 |     |                                                                                                                                                                                                                                                                                                                                       |    |
| 16 | Data monitoring | 21a | Composition of data monitoring committee (DMC); summary of its role and reporting structure; statement of whether it is independent from the sponsor and competing interests; and reference to where further details about its charter can be found, if not in the protocol. Alternatively, an explanation of why a DMC is not needed | 10 |
| 17 |                 |     |                                                                                                                                                                                                                                                                                                                                       |    |
| 18 |                 |     |                                                                                                                                                                                                                                                                                                                                       |    |
| 19 |                 |     |                                                                                                                                                                                                                                                                                                                                       |    |
| 20 |                 |     |                                                                                                                                                                                                                                                                                                                                       |    |
| 21 |                 |     |                                                                                                                                                                                                                                                                                                                                       |    |
| 22 |                 | 21b | Description of any interim analyses and stopping guidelines, including who will have access to these interim results and make the final decision to terminate the trial                                                                                                                                                               | 10 |
| 23 |                 |     |                                                                                                                                                                                                                                                                                                                                       |    |
| 24 |                 |     |                                                                                                                                                                                                                                                                                                                                       |    |
| 25 | Harms           | 22  | Plans for collecting, assessing, reporting, and managing solicited and spontaneously reported adverse events and other unintended effects of trial interventions or trial conduct                                                                                                                                                     | NA |
| 26 |                 |     |                                                                                                                                                                                                                                                                                                                                       |    |
| 27 |                 |     |                                                                                                                                                                                                                                                                                                                                       |    |
| 28 | Auditing        | 23  | Frequency and procedures for auditing trial conduct, if any, and whether the process will be independent from investigators and the sponsor                                                                                                                                                                                           | NA |
| 29 |                 |     |                                                                                                                                                                                                                                                                                                                                       |    |
| 30 |                 |     |                                                                                                                                                                                                                                                                                                                                       |    |
| 31 |                 |     |                                                                                                                                                                                                                                                                                                                                       |    |

#### 32 **Ethics and dissemination**

|    |                          |    |                                                                                                                                                                                                                                  |               |
|----|--------------------------|----|----------------------------------------------------------------------------------------------------------------------------------------------------------------------------------------------------------------------------------|---------------|
| 33 |                          |    |                                                                                                                                                                                                                                  |               |
| 34 | Research ethics approval | 24 | Plans for seeking research ethics committee/institutional review board (REC/IRB) approval                                                                                                                                        | 11            |
| 35 |                          |    |                                                                                                                                                                                                                                  |               |
| 36 |                          |    |                                                                                                                                                                                                                                  |               |
| 37 | Protocol amendments      | 25 | Plans for communicating important protocol modifications (eg, changes to eligibility criteria, outcomes, analyses) to relevant parties (eg, investigators, REC/IRBs, trial participants, trial registries, journals, regulators) | Supplementary |
| 38 |                          |    |                                                                                                                                                                                                                                  |               |
| 39 |                          |    |                                                                                                                                                                                                                                  |               |
| 40 |                          |    |                                                                                                                                                                                                                                  |               |
| 41 |                          |    |                                                                                                                                                                                                                                  |               |
| 42 |                          |    |                                                                                                                                                                                                                                  |               |

|    |                               |     |                                                                                                                                                                                                                                                                                     |          |
|----|-------------------------------|-----|-------------------------------------------------------------------------------------------------------------------------------------------------------------------------------------------------------------------------------------------------------------------------------------|----------|
| 1  | Consent or assent             | 26a | Who will obtain informed consent or assent from potential trial participants or authorised surrogates, and how (see Item 32)                                                                                                                                                        | 5, 10    |
| 2  |                               |     |                                                                                                                                                                                                                                                                                     |          |
| 3  |                               |     |                                                                                                                                                                                                                                                                                     |          |
| 4  |                               | 26b | Additional consent provisions for collection and use of participant data and biological specimens in ancillary studies, if applicable                                                                                                                                               | NA       |
| 5  |                               |     |                                                                                                                                                                                                                                                                                     |          |
| 6  |                               |     |                                                                                                                                                                                                                                                                                     |          |
| 7  | Confidentiality               | 27  | How personal information about potential and enrolled participants will be collected, shared, and maintained in order to protect confidentiality before, during, and after the trial                                                                                                | 10       |
| 8  |                               |     |                                                                                                                                                                                                                                                                                     |          |
| 9  |                               |     |                                                                                                                                                                                                                                                                                     |          |
| 10 | Declaration of interests      | 28  | Financial and other competing interests for principal investigators for the overall trial and each study site                                                                                                                                                                       | 11       |
| 11 |                               |     |                                                                                                                                                                                                                                                                                     |          |
| 12 |                               |     |                                                                                                                                                                                                                                                                                     |          |
| 13 | Access to data                | 29  | Statement of who will have access to the final trial dataset, and disclosure of contractual agreements that limit such access for investigators                                                                                                                                     | 10       |
| 14 |                               |     |                                                                                                                                                                                                                                                                                     |          |
| 15 |                               |     |                                                                                                                                                                                                                                                                                     |          |
| 16 | Ancillary and post-trial care | 30  | Provisions, if any, for ancillary and post-trial care, and for compensation to those who suffer harm from trial participation                                                                                                                                                       | NA       |
| 17 |                               |     |                                                                                                                                                                                                                                                                                     |          |
| 18 |                               |     |                                                                                                                                                                                                                                                                                     |          |
| 19 |                               |     |                                                                                                                                                                                                                                                                                     |          |
| 20 | Dissemination policy          | 31a | Plans for investigators and sponsor to communicate trial results to participants, healthcare professionals, the public, and other relevant groups (eg, via publication, reporting in results databases, or other data sharing arrangements), including any publication restrictions | 11       |
| 21 |                               |     |                                                                                                                                                                                                                                                                                     |          |
| 22 |                               |     |                                                                                                                                                                                                                                                                                     |          |
| 23 |                               |     |                                                                                                                                                                                                                                                                                     |          |
| 24 |                               |     |                                                                                                                                                                                                                                                                                     |          |
| 25 | <b>Appendices</b>             |     |                                                                                                                                                                                                                                                                                     |          |
| 26 |                               |     |                                                                                                                                                                                                                                                                                     |          |
| 27 | Informed consent materials    | 32  | Model consent form and other related documentation given to participants and authorised surrogates                                                                                                                                                                                  | Appendix |
| 28 |                               |     |                                                                                                                                                                                                                                                                                     |          |
| 29 |                               |     |                                                                                                                                                                                                                                                                                     |          |
| 30 | Biological specimens          | 33  | Plans for collection, laboratory evaluation, and storage of biological specimens for genetic or molecular analysis in the current trial and for future use in ancillary studies, if applicable                                                                                      | Appendix |
| 31 |                               |     |                                                                                                                                                                                                                                                                                     |          |
| 32 |                               |     |                                                                                                                                                                                                                                                                                     |          |

\*It is strongly recommended that this checklist be read in conjunction with the SPIRIT 2013 Explanation & Elaboration for important clarification on the items. Amendments to the protocol should be tracked and dated. The SPIRIT checklist is copyrighted by the SPIRIT Group under the Creative Commons "[Attribution-NonCommercial-NoDerivs 3.0 Unported](https://creativecommons.org/licenses/by-nc-nd/3.0/)" license.

### Items from the World Health Organization Trial Registration Data Set

| Data category                                 | Information                                                                                                                                                                                                                                                                                                                                                                                                                                                                                                                                                                                                                                                              |
|-----------------------------------------------|--------------------------------------------------------------------------------------------------------------------------------------------------------------------------------------------------------------------------------------------------------------------------------------------------------------------------------------------------------------------------------------------------------------------------------------------------------------------------------------------------------------------------------------------------------------------------------------------------------------------------------------------------------------------------|
| Primary registry and trial identifying number | ClinicalTrials.gov NCT04122235                                                                                                                                                                                                                                                                                                                                                                                                                                                                                                                                                                                                                                           |
| Date of registration in primary registry      | 09.02.2019                                                                                                                                                                                                                                                                                                                                                                                                                                                                                                                                                                                                                                                               |
| Secondary identifying numbers                 | REC 2019/11093                                                                                                                                                                                                                                                                                                                                                                                                                                                                                                                                                                                                                                                           |
| Source(s) of monetary or material support     | The Norwegian Cancer Association<br>The UNI foundation<br>The South-Eastern Norway Regional Health Authorities<br>The funding sources had no role in the design of this study and will not have any role during its execution, analyses, interpretation of the data, or decision to submit results                                                                                                                                                                                                                                                                                                                                                                       |
| Primary sponsor                               | Hospital of Southern Norway<br>The sponsor had no role in the design of this study and will not have any role during its execution, analyses, interpretation of the data, or decision to submit results                                                                                                                                                                                                                                                                                                                                                                                                                                                                  |
| Contact for public queries                    | Ingvild.vistad@sshf.no                                                                                                                                                                                                                                                                                                                                                                                                                                                                                                                                                                                                                                                   |
| Contact for scientific queries                | Ingvild Vistad MD, Hospital of Southern Norway                                                                                                                                                                                                                                                                                                                                                                                                                                                                                                                                                                                                                           |
| Public title                                  | The LETSGO study                                                                                                                                                                                                                                                                                                                                                                                                                                                                                                                                                                                                                                                         |
| Scientific title                              | Lifestyle and Empowerment Techniques in Survivorship of Gynecologic Oncology (LETSGO study).<br>A multicenter longitudinal intervention study using mobile health technology and biobanking.                                                                                                                                                                                                                                                                                                                                                                                                                                                                             |
| Countries of recruitment                      | Norway                                                                                                                                                                                                                                                                                                                                                                                                                                                                                                                                                                                                                                                                   |
| Health condition(s) or problem(s) studied     | Follow-up of gynecological cancer patients                                                                                                                                                                                                                                                                                                                                                                                                                                                                                                                                                                                                                               |
| Intervention(s)                               | Partly nurse-led follow up with an emphasis on self-management and physical activity versus traditional follow-up                                                                                                                                                                                                                                                                                                                                                                                                                                                                                                                                                        |
| Key inclusion and exclusion criteria          | Inclusion criteria: (1) histologically verified cervical cancer (restricted to squamous cell carcinoma, adenocarcinoma, or adenosquamous carcinoma), endometrial cancer, ovarian cancer (restricted to epithelial type), or vulvar cancer; (2) scheduled for follow-up after completed primary standard treatment; (3) able to complete patient-reported outcome measures independently in Norwegian; (4) $\geq 18$ years; and (5) able to provide informed consent.<br>Exclusion criteria: (1) participation in a clinical treatment trial; (2) ongoing intravenous maintenance treatment (e.g., bevacizumab); (3) cervical cancer patients treated with trachelectomy. |
| Study type                                    | Quasi-experimental multicenter clinical study with intervention hospitals and control hospitals                                                                                                                                                                                                                                                                                                                                                                                                                                                                                                                                                                          |
| Date of first enrolment                       | November 2019                                                                                                                                                                                                                                                                                                                                                                                                                                                                                                                                                                                                                                                            |
| Target sample size                            | 754                                                                                                                                                                                                                                                                                                                                                                                                                                                                                                                                                                                                                                                                      |
| Recruitment status                            | Recruiting                                                                                                                                                                                                                                                                                                                                                                                                                                                                                                                                                                                                                                                               |
| Primary outcome(s)                            | Patient empowerment                                                                                                                                                                                                                                                                                                                                                                                                                                                                                                                                                                                                                                                      |
| Key secondary outcomes                        | Health-related QoL; physical activity; health economy; changes in biomarkers                                                                                                                                                                                                                                                                                                                                                                                                                                                                                                                                                                                             |



## Protocol version

| Date     | Original                                                                                                                                                                                                                                                                                                                                                |
|----------|---------------------------------------------------------------------------------------------------------------------------------------------------------------------------------------------------------------------------------------------------------------------------------------------------------------------------------------------------------|
| 12.02.19 | Amendment #1 Added one investigator.                                                                                                                                                                                                                                                                                                                    |
| 14.09.19 | Amendment #2 Correction of typographical errors in tables                                                                                                                                                                                                                                                                                               |
| 09.10.19 | Amendment #3 Blood tests at recurrences. Specification of inclusion/exclusion criteria (patients on <i>intravenous maintenance therapy</i> cannot be included)                                                                                                                                                                                          |
| 22.10.19 | Amendment #4 More detailed information on budget                                                                                                                                                                                                                                                                                                        |
| 30.10.19 | Amendment #5 Outcome regarding biomarkers moved from secondary to tertiary outcome                                                                                                                                                                                                                                                                      |
| 06.11.19 | Amendment #6 Correction of typographical errors                                                                                                                                                                                                                                                                                                         |
| 09.12.20 | Amendment #7 Enrollment date adjusted. Removed Erythrocyte sedimentation rate from the blood tests. Emphasized that the LETSGO-app will not be uninstalled in low-risk group at 12 months. Sexuality added as secondary outcome. Added information on questionnaires used for evaluating physical activity, fear of recurrence of cancer and sexuality. |
