# Supplementary material for: Lifestyle and Empowerment Techniques in Survivorship of Gynaecologic Oncology (LETSGO study): a study protocol for a multicentre longitudinal interventional study using mobile health technology and biobanking
Source: PubMed Central journal article supplement — BMJ Open. 2021 Jul 12;11(7):e050930. doi: 10.1136/bmjopen-2021-050930 (PMC8276283; doi:10.1136/bmjopen-2021-050930), 2021-07-12
Supplement: bmjopen-2021-050930supp002.pdf [file bmjopen-2021-050930supp002.pdf]

### Items from the World Health Organization Trial Registration Data Set

| Data category                                 | Information                                                                                                                                                                                                                                                                                                                                                                                                                                                                                                                                                                                                                                                              |
|-----------------------------------------------|--------------------------------------------------------------------------------------------------------------------------------------------------------------------------------------------------------------------------------------------------------------------------------------------------------------------------------------------------------------------------------------------------------------------------------------------------------------------------------------------------------------------------------------------------------------------------------------------------------------------------------------------------------------------------|
| Primary registry and trial identifying number | ClinicalTrials.gov NCT04122235                                                                                                                                                                                                                                                                                                                                                                                                                                                                                                                                                                                                                                           |
| Date of registration in primary registry      | 09.02.2019                                                                                                                                                                                                                                                                                                                                                                                                                                                                                                                                                                                                                                                               |
| Secondary identifying numbers                 | REC 2019/11093                                                                                                                                                                                                                                                                                                                                                                                                                                                                                                                                                                                                                                                           |
| Source(s) of monetary or material support     | The Norwegian Cancer Association<br>The UNI foundation<br>The South-Eastern Norway Regional Health Authorities<br>The funding sources had no role in the design of this study and will not have any role during its execution, analyses, interpretation of the data, or decision to submit results                                                                                                                                                                                                                                                                                                                                                                       |
| Primary sponsor                               | Hospital of Southern Norway<br>The sponsor had no role in the design of this study and will not have any role during its execution, analyses, interpretation of the data, or decision to submit results                                                                                                                                                                                                                                                                                                                                                                                                                                                                  |
| Contact for public queries                    | Ingvild.vistad@sshf.no                                                                                                                                                                                                                                                                                                                                                                                                                                                                                                                                                                                                                                                   |
| Contact for scientific queries                | Ingvild Vistad MD, Hospital of Southern Norway                                                                                                                                                                                                                                                                                                                                                                                                                                                                                                                                                                                                                           |
| Public title                                  | The LETSGO study                                                                                                                                                                                                                                                                                                                                                                                                                                                                                                                                                                                                                                                         |
| Scientific title                              | Lifestyle and Empowerment Techniques in Survivorship of Gynecologic Oncology (LETSGO study).<br>A multicenter longitudinal intervention study using mobile health technology and biobanking.                                                                                                                                                                                                                                                                                                                                                                                                                                                                             |
| Countries of recruitment                      | Norway                                                                                                                                                                                                                                                                                                                                                                                                                                                                                                                                                                                                                                                                   |
| Health condition(s) or problem(s) studied     | Follow-up of gynecological cancer patients                                                                                                                                                                                                                                                                                                                                                                                                                                                                                                                                                                                                                               |
| Intervention(s)                               | Partly nurse-led follow up with an emphasis on self-management and physical activity versus traditional follow-up                                                                                                                                                                                                                                                                                                                                                                                                                                                                                                                                                        |
| Key inclusion and exclusion criteria          | Inclusion criteria: (1) histologically verified cervical cancer (restricted to squamous cell carcinoma, adenocarcinoma, or adenosquamous carcinoma), endometrial cancer, ovarian cancer (restricted to epithelial type), or vulvar cancer; (2) scheduled for follow-up after completed primary standard treatment; (3) able to complete patient-reported outcome measures independently in Norwegian; (4) $\geq 18$ years; and (5) able to provide informed consent.<br>Exclusion criteria: (1) participation in a clinical treatment trial; (2) ongoing intravenous maintenance treatment (e.g., bevacizumab); (3) cervical cancer patients treated with trachelectomy. |
| Study type                                    | Quasi-experimental multicenter clinical study with intervention hospitals and control hospitals                                                                                                                                                                                                                                                                                                                                                                                                                                                                                                                                                                          |
| Date of first enrolment                       | November 2019                                                                                                                                                                                                                                                                                                                                                                                                                                                                                                                                                                                                                                                            |
| Target sample size                            | 754                                                                                                                                                                                                                                                                                                                                                                                                                                                                                                                                                                                                                                                                      |
| Recruitment status                            | Recruiting                                                                                                                                                                                                                                                                                                                                                                                                                                                                                                                                                                                                                                                               |
| Primary outcome(s)                            | Patient empowerment                                                                                                                                                                                                                                                                                                                                                                                                                                                                                                                                                                                                                                                      |
| Key secondary outcomes                        | Health-related QoL; physical activity; health economy; changes in biomarkers                                                                                                                                                                                                                                                                                                                                                                                                                                                                                                                                                                                             |

## Protocol version

| Date     | Original                                                                                                                                                                                                                                                                                                                                                |
|----------|---------------------------------------------------------------------------------------------------------------------------------------------------------------------------------------------------------------------------------------------------------------------------------------------------------------------------------------------------------|
| 12.02.19 | Amendment #1 Added one investigator.                                                                                                                                                                                                                                                                                                                    |
| 14.09.19 | Amendment #2 Correction of typographical errors in tables                                                                                                                                                                                                                                                                                               |
| 09.10.19 | Amendment #3 Blood tests at recurrences. Specification of inclusion/exclusion criteria (patients on <i>intravenous maintenance therapy</i> cannot be included)                                                                                                                                                                                          |
| 22.10.19 | Amendment #4 More detailed information on budget                                                                                                                                                                                                                                                                                                        |
| 30.10.19 | Amendment #5 Outcome regarding biomarkers moved from secondary to tertiary outcome                                                                                                                                                                                                                                                                      |
| 06.11.19 | Amendment #6 Correction of typographical errors                                                                                                                                                                                                                                                                                                         |
| 09.12.20 | Amendment #7 Enrollment date adjusted. Removed Erythrocyte sedimentation rate from the blood tests. Emphasized that the LETSGO-app will not be uninstalled in low-risk group at 12 months. Sexuality added as secondary outcome. Added information on questionnaires used for evaluating physical activity, fear of recurrence of cancer and sexuality. |
